# Supplementary material
Source: PubMed Central journal article supplement (PMC4019998)
Supplement: NIHMS580710-supplement-Supplement.pdf [file NIHMS580710-supplement-Supplement.pdf]

**Supplementary Information for****Cardioprotection by S-nitrosation of a cysteine switch on mitochondrial complex I**

Edward T. Chouchani<sup>1,2</sup>, Carmen Methner<sup>2</sup>, Sergiy M. Nadtochiy<sup>3</sup>, Angela Logan<sup>1</sup>, Victoria R. Pell<sup>2</sup>, Shujing Ding<sup>1</sup>, Andrew M. James<sup>1</sup>, Helena M. Cochemé<sup>1,4</sup>, Johannes Reinhold<sup>1</sup>, Kathryn S. Lilley<sup>5</sup>, Linda Partridge<sup>4</sup>, Ian M. Fearnley<sup>1</sup>, Alan J. Robinson<sup>1</sup>, Richard C. Hartley<sup>6</sup>, Robin A.J. Smith<sup>7</sup>, Thomas Krieg<sup>2</sup>, Paul S. Brookes<sup>3</sup> & Michael P. Murphy<sup>1</sup>

<sup>1</sup>MRC Mitochondrial Biology Unit, Hills Road, Cambridge CB2 0XY, UK.

<sup>2</sup>Department of Medicine, University of Cambridge, Addenbrooke's Hospital, Hills Road, Cambridge, CB2 2QQ, UK. <sup>3</sup>Department of Anesthesiology, University of Rochester Medical Center, 601 Elmwood Avenue, Rochester, NY 14642, USA.

<sup>4</sup>Institute of Healthy Ageing, Department of Genetics, Evolution and Environment, University College London, Gower Street, London WC1E 6BT, UK. <sup>5</sup> Department of Biochemistry, Cambridge System Biology Centre, University of Cambridge, Cambridge CB2 1GA, UK. <sup>6</sup>Centre for the Chemical Research of Ageing, WestCHEM School of Chemistry, University of Glasgow, Glasgow, G12 8QQ, UK. <sup>7</sup>Department of Chemistry, University of Otago, P.O. Box 56, Dunedin 9054, New Zealand.

## Supplementary Figure 1

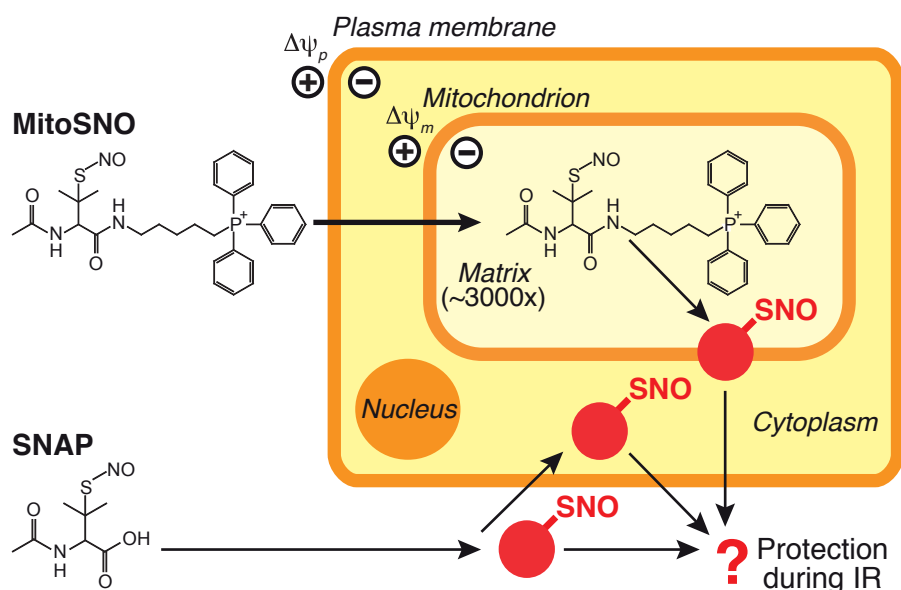**Fig. S1 Selective uptake of MitoSNO into mitochondria *in vivo*.**

The lipophilic triphenylphosphonium (TPP) cation component of MitoSNO enables it to be taken up rapidly across biological membranes due to its large ionic radius and hydrophobic surface that lowers its activation energy for movement through a phospholipid bilayer. The extent of uptake is determined by the Nernst equation, and predicts that the uptake should be several thousand-fold. Consequently MitoSNO is accumulated within mitochondria *in vivo* selectively, driven by the large membrane potential across the mitochondrial inner membrane. This selective uptake by MitoSNO should lead to the selective S-nitrosation of mitochondrial thiol proteins which may contribute to protection against IR injury *in vivo*. In contrast, the untargeted S-nitrosating agent SNAP will only S-nitrosate non-mitochondrial proteins. Therefore if the S-nitrosation of mitochondrial proteins contributes to protection against IR injury, then MitoSNO should be protective whereas SNAP should not.

## Supplementary Figure 2

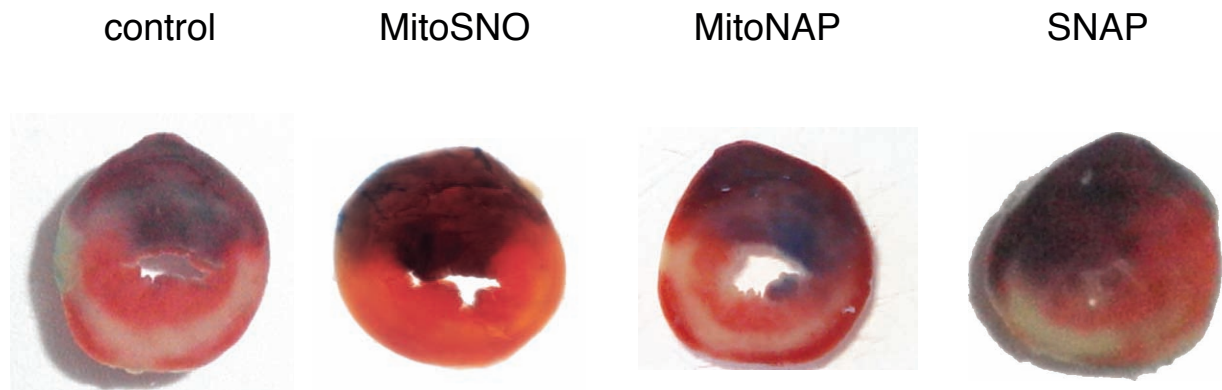

**Fig. S2: High resolution representative images of hearts following TTC staining used for infarct quantification in Fig. 1b.** Blue staining by Evans Blue dye indicates the non-risk zone. Infarcts are quantified as % TTC stained infarct (white) as a proportion of the at risk zone (non-blue stained). Full experimental details are provided in the supplementary methods section

### Supplementary Figure 3

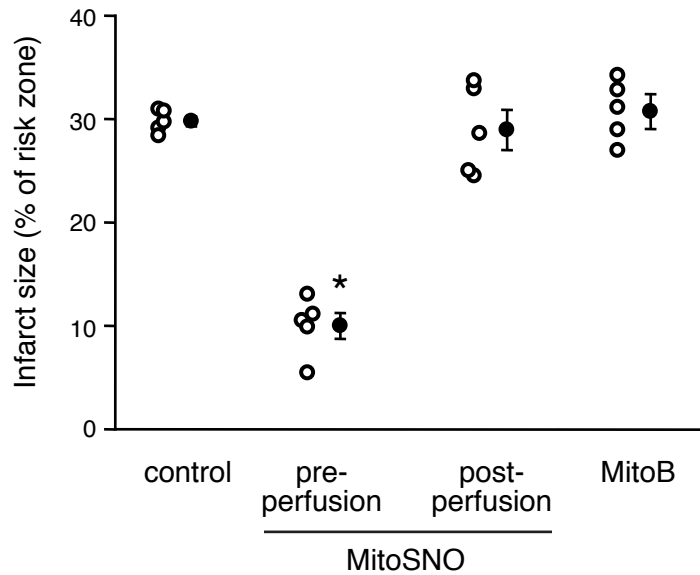

**Fig. S3 Injection of MitoSNO post-reperfusion does not protect against IR injury.** Cardiac IR injury was generated in mice *in vivo* as described in Fig. 1b. Injection of MitoSNO (100 ng/kg) administered by tail vein IV 5 min before reperfusion was protective against IR injury. However, injection of MitoSNO 10 min after the initiation of reperfusion was not protective. MitoB (3  $\mu$ mol/kg), injected by IV 1.5 h prior to reperfusion did not affect infarct size.  $N \geq 3$  for all groups, \*  $p < 0.05$  versus control.

## Supplementary Figure 4

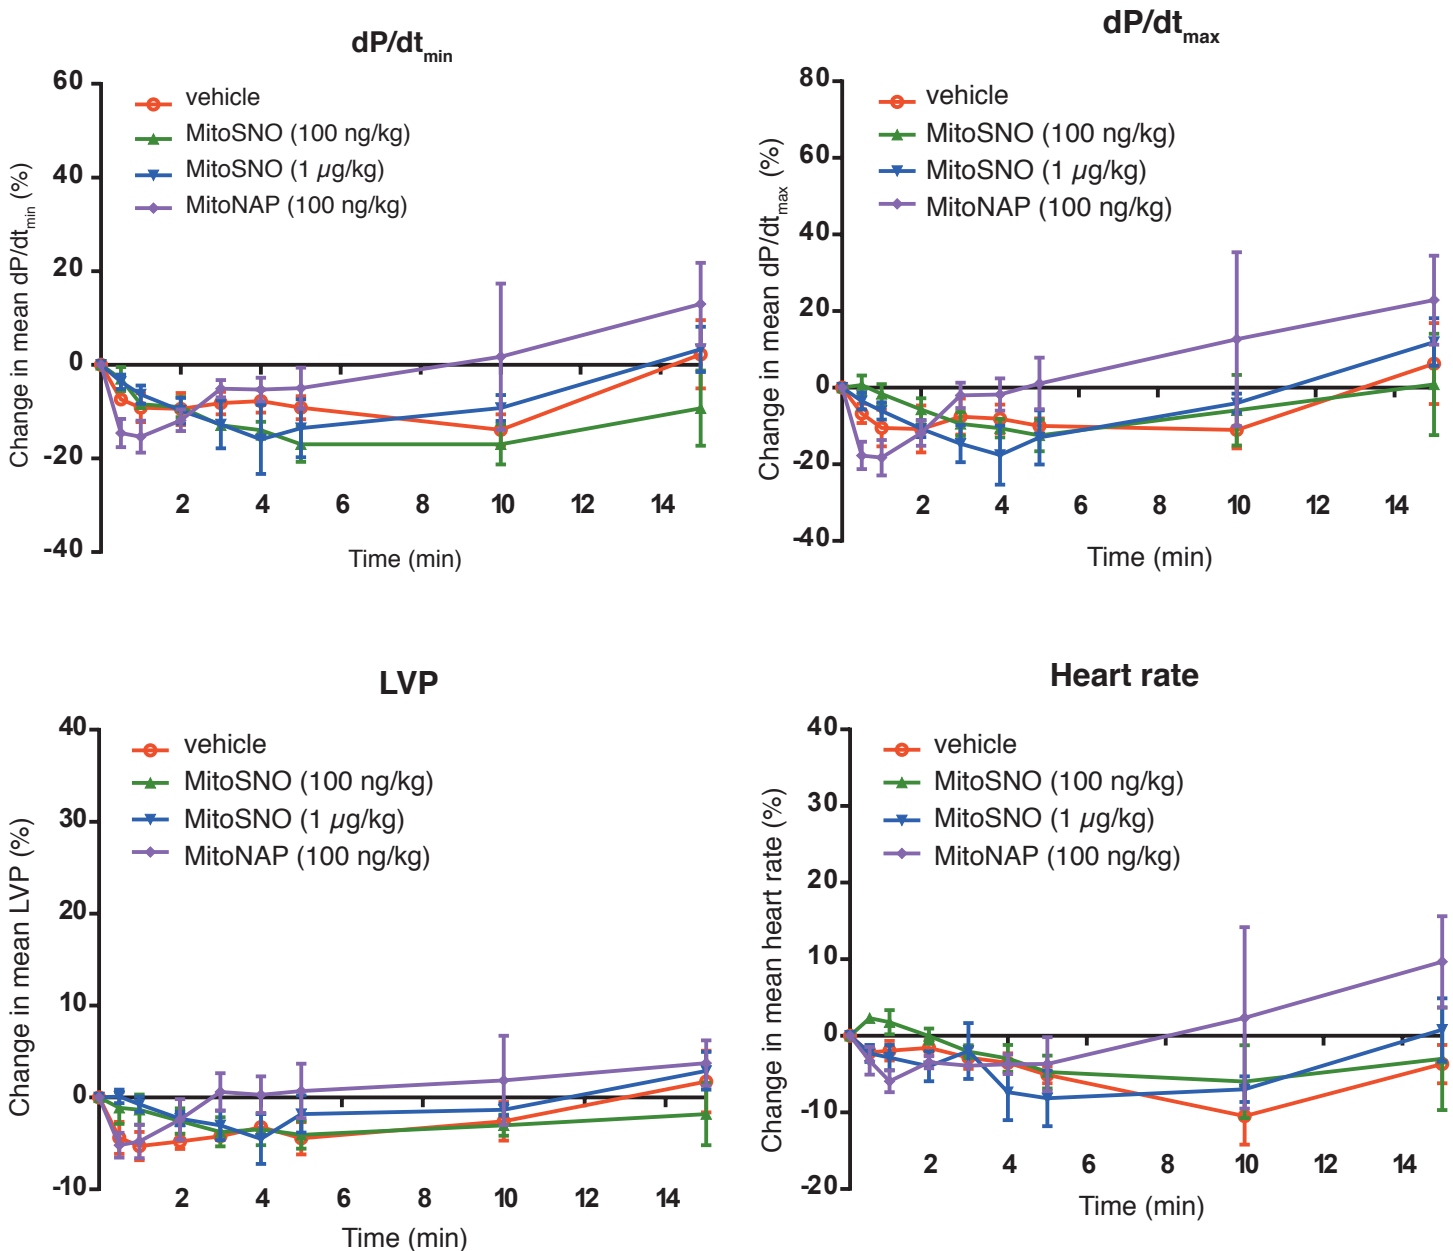

**Fig. S4 MitoSNO does not affect hemodynamics**

A closed-chest experimental model was used to assess the effect of MitoSNO on hemodynamics. A pressure-conductance catheter was inserted into the right carotid artery and extended into the left ventricle. The effect of intravenous (IV) administration of MitoSNO (100 ng/kg and 1 µg/kg), MitoNAP (100 ng/kg) and vehicle (saline) on the hemodynamic parameters: left ventricular pressure (LVP), heart rate,  $dP/dt_{max}$  and  $dP/dt_{min}$  were determined. Hemodynamic parameters recovered to equivalent to or above baseline levels 15 min post treatment. There was no significant difference between MitoSNO or MitoNAP in comparison to vehicle at any time point of the experiment in any of the parameters measured.  $N = 3$  for each group.

## Supplementary Figure 5

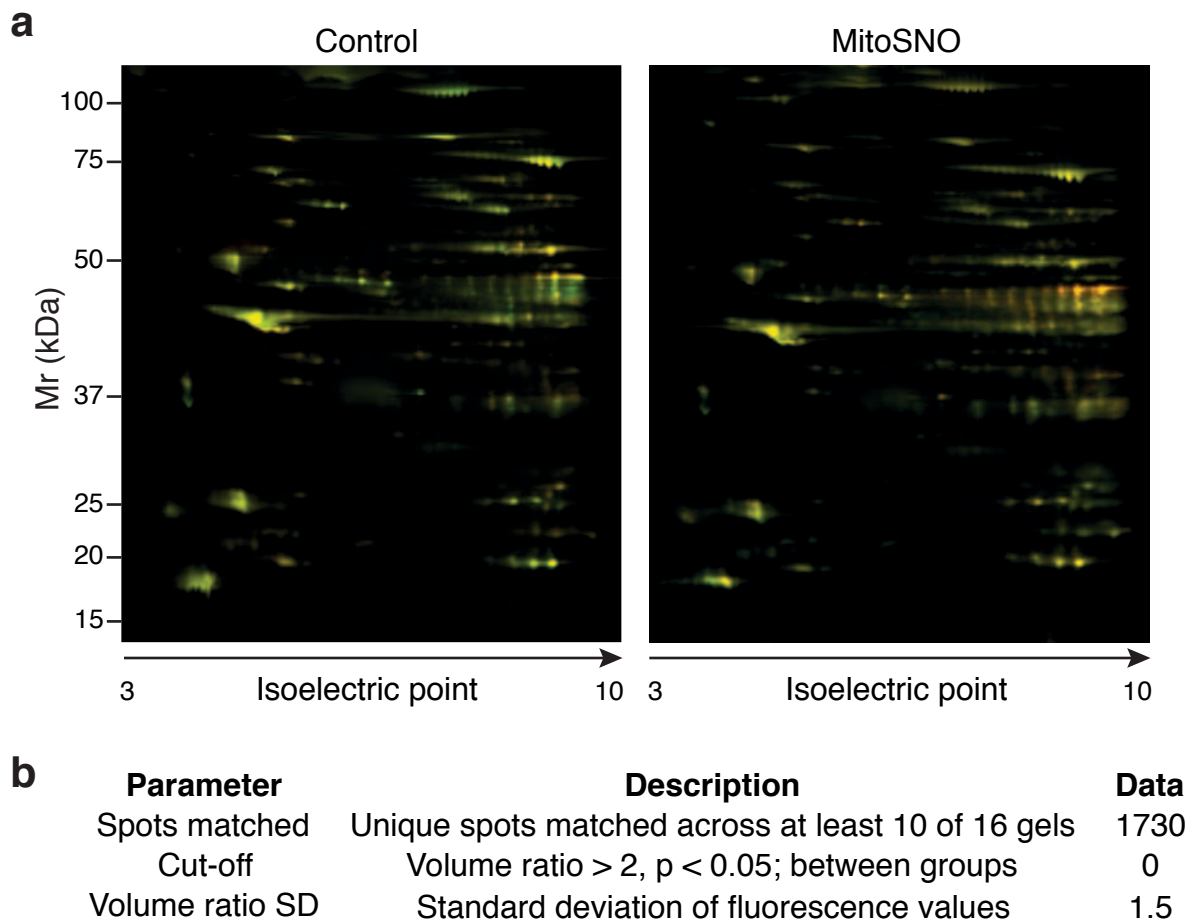

**Fig. S5 Lack of broad *S*-nitrosation of mitochondrial proteins by MitoSNO within the intact heart.**

**a.** Intact mouse hearts were perfused under anoxic conditions with MitoSNO and compared with hearts perfused in the absence of MitoSNO. After the perfusion, *S*-nitrosated mitochondrial thiols were selectively reduced and tagged with Cy5 maleimide (red), while all other oxidative modifications remained untagged. The Cy3 (green) labeled standard sample of mitochondrial proteins from a single heart replicate is pooled with the standard sample from four independent preparations and combined individually with the control and MitoSNO-treated Cy5 samples of every replicate sample (four control, four treated; eight in total). Combined samples are resolved by two-dimensional electrophoresis on the same gel and fluorescently scanned. Protein spots that appear red on the superimposed image of the treated gels (right) but not the control gels (left) have undergone MitoSNO-mediated *S*-nitrosation within the intact heart. Spots that appear yellow in both gels are equally oxidised in each preparation. The superimposed fluorescent scans of representative gels from each triplicate experimental condition are shown. Unlike the SDS-PAGE analysis shown in Fig. 1a, 2D proteomic determination of *S*-nitrosation events requires the use of a pooled standard Cy3 component to control for variability between gel preparations. **b.** Summary of proteomic analysis of *S*-nitrosated mitochondrial proteins in anoxic perfused hearts from four independent replicates indicating that MitoSNO causes negligible *S*-nitrosation of mitochondrial proteins within the intact heart. To ensure accurate comparison between gels and to allow for statistical analysis between groups, a threshold for inclusion required spot matching in at least 10 of 16 gels.

## Supplementary Figure 6

a

| Band | Complex Identified | Subunits identified | Unique peptides |
|------|--------------------|---------------------|-----------------|
| C1   | Complex I          | 28                  | 103             |
| CV   | ATP Synthase       | 7                   | 19              |

b

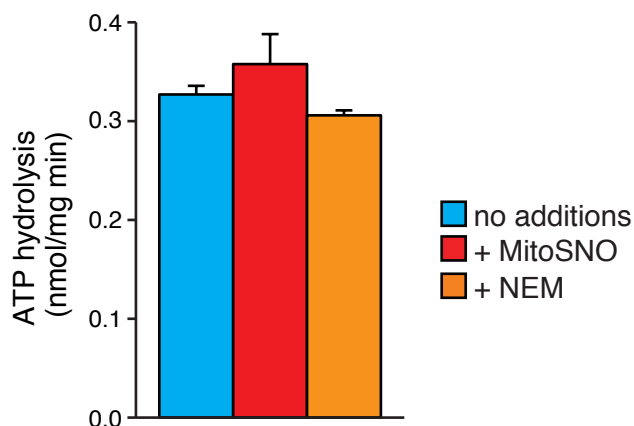

**Fig. S6 MS identification of *S*-nitrosated respiratory complexes *in vivo* and impact of *S*-nitrosation on ATP synthase activity.**

**a**, Mass spectrometric identification of the mitochondrial protein complexes *S*-nitrosated by MitoSNO *in vivo*. To confirm the identity of the two mitochondrial oxidative phosphorylation complexes that were *S*-nitrosated by MitoSNO and resolved by BN-PAGE in Fig. 1f, the bands exhibiting fluorescence were excised, resolved by SDS-PAGE and protein bands were excised and identified by Orbitrap MS/MS. The table summarizes the presence of intact complexes from these samples as determined by requiring the identification of the majority of their constituent subunits by MS/MS. The band referred to as C1 in Fig. 1f contains intact complex I as determined by identification of 28 subunits, while the CV band contains intact ATP synthase as determined by identification of 7 subunits. Samples were digested with trypsin. Full sequencing data is provided in Supplementary Table 1. **b**, *S*-nitrosation of the  $F_0F_1$ -ATP synthase by MitoSNO does not affect its activity, nor does alkylation of all surface cysteine residues with NEM. Mitochondrial membranes were incubated with no additions, with MitoSNO, or with NEM, and the ATP hydrolysis activity of  $F_0F_1$ -ATP synthase was determined. N=3.

## Supplementary Figure 7

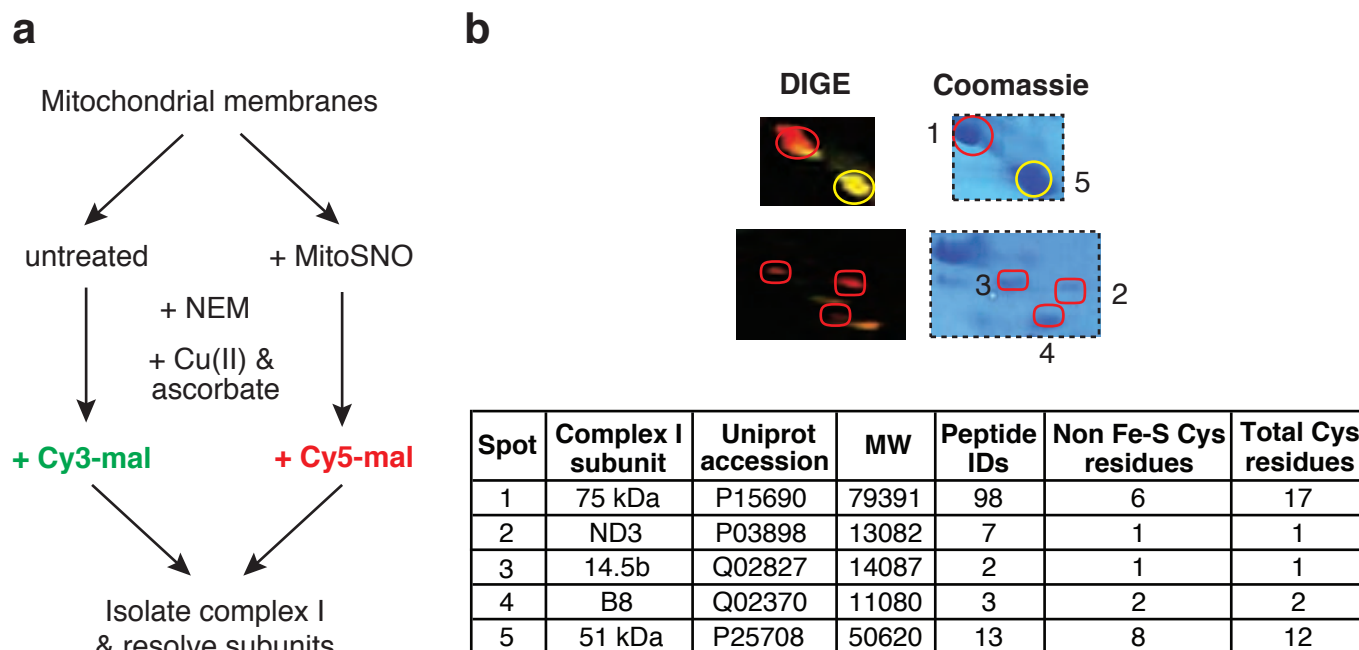**Fig. S7 Fluorescent labeling of complex I subunits.**

**a**, Mitochondrial membranes treated  $\pm$  MitoSNO (50  $\mu$ M) have unreacted cysteine thiols blocked with NEM followed by selective reduction and tagging of *S*-nitrosothiols in the presence of fluorescent cysteine-reactive maleimides. **b**, Fluorescent scan and Coomassie Blue stain of complex I subunits of interest. Spots highlighted in red contained *S*-nitrosated subunit(s) due to selective labeling with a red fluorescent cysteine-reactive dye. The spot highlighted in yellow is a representative subunit exhibiting equivalent red and green fluorescence due to labeling of occluded cysteine thiols. The Table shows the identification of complex I subunits by mass spectrometry. Full supporting mass spectrometry data are contained in Table S2.



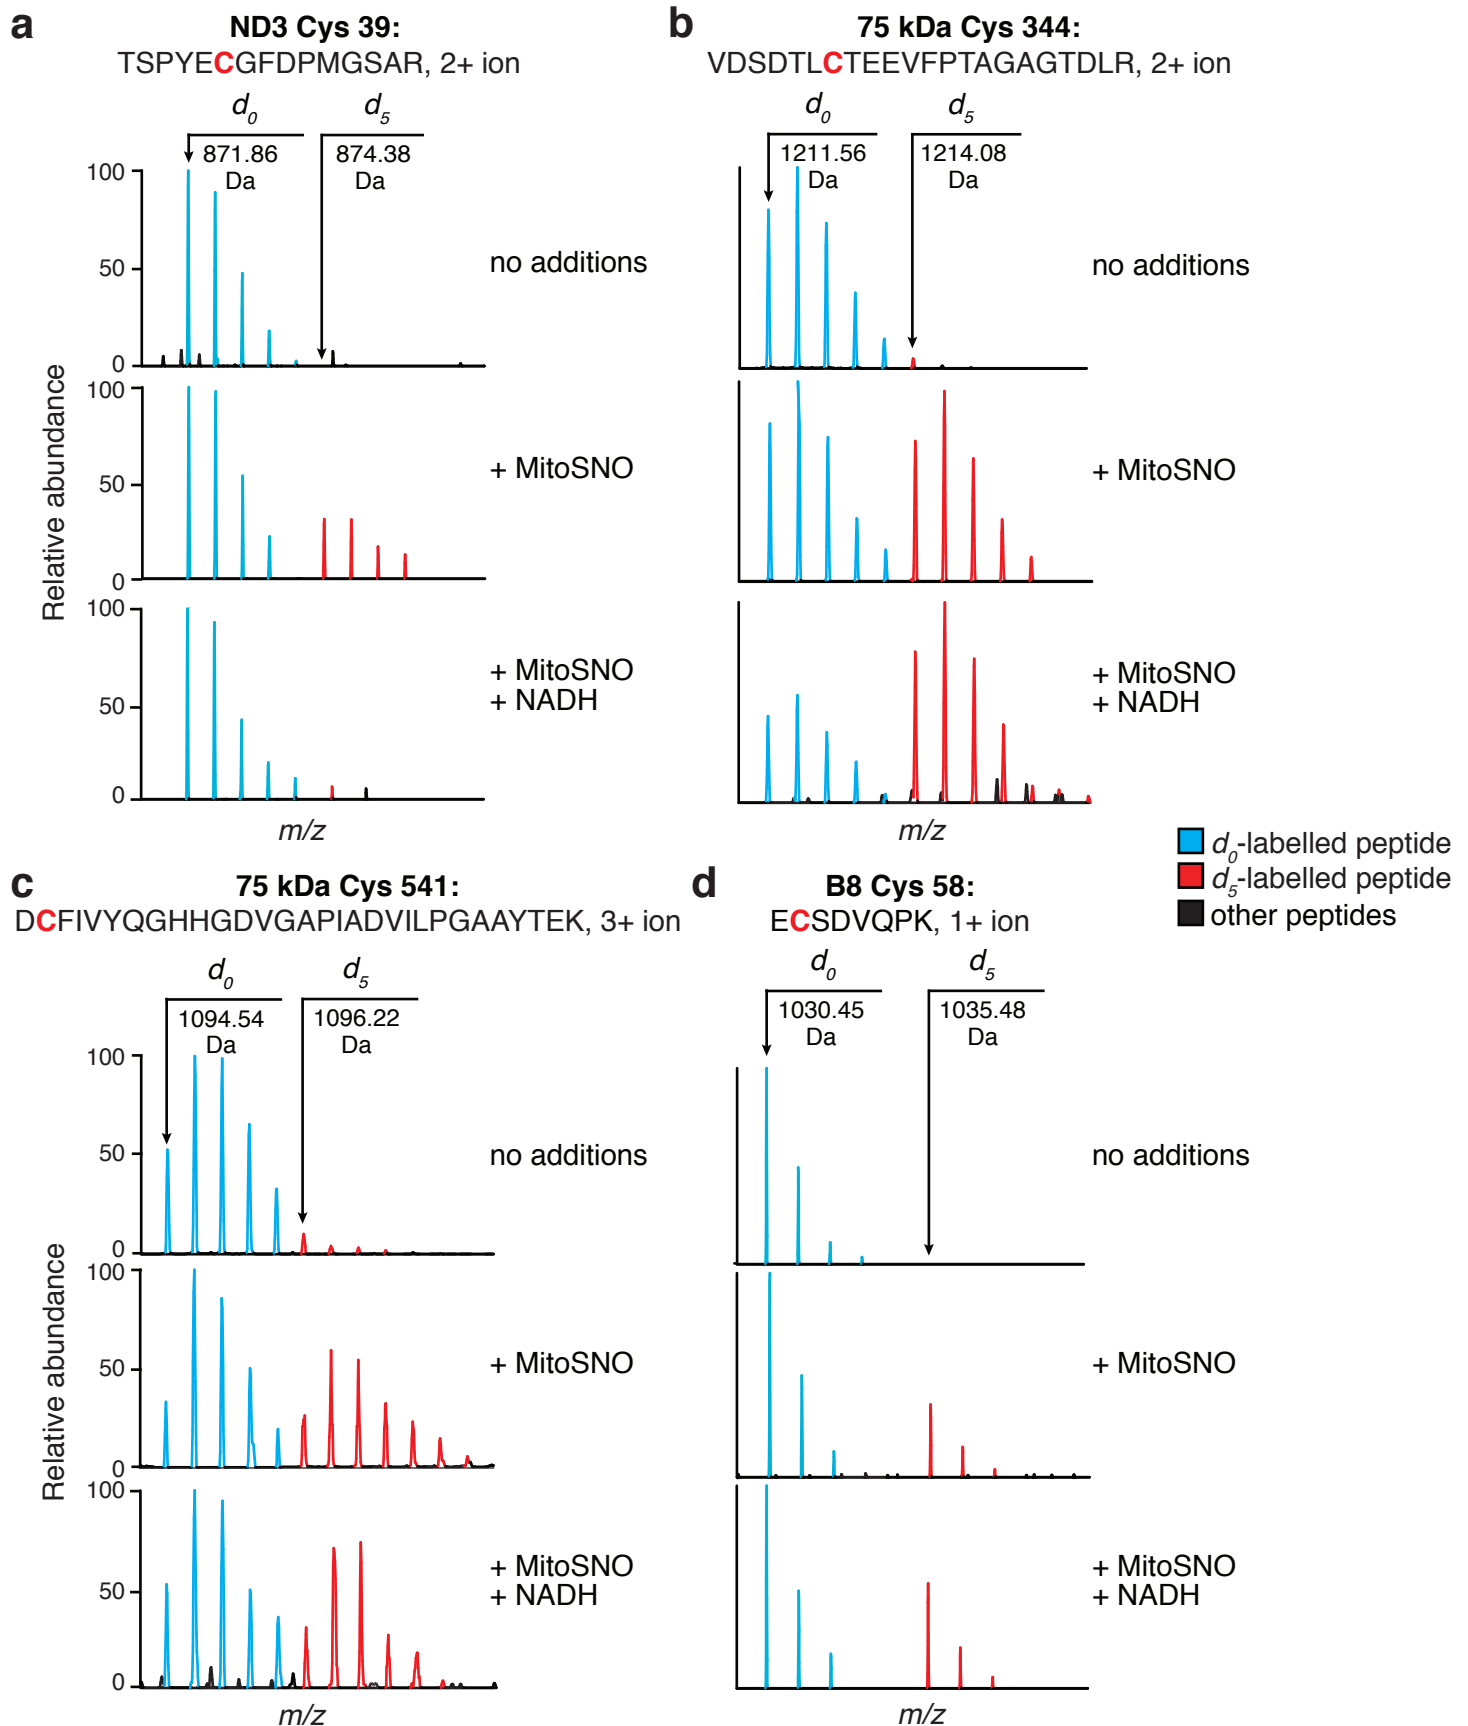

**Fig. S9 Precursor ion mass spectra of ratiometrically labeled *S*-nitrosated cysteines within complex I.** The  $d_0$ -labelled peptides that correspond to unmodified cysteine residues are highlighted in blue, while  $d_5$ -labelled peptides corresponding to *S*-nitrosated cysteines are highlighted in red. The relative intensity of these two forms allows for quantification of *S*-nitrosation, shown in Figs. 2 & 3. **a**, ND3 cys 39 *S*-nitrosation requires low complex I activity conditions, while for all other susceptible complex I cysteines *S*-nitrosation is independent of complex I activity (**b-d**). Peptide sequence, charge and mass are included.

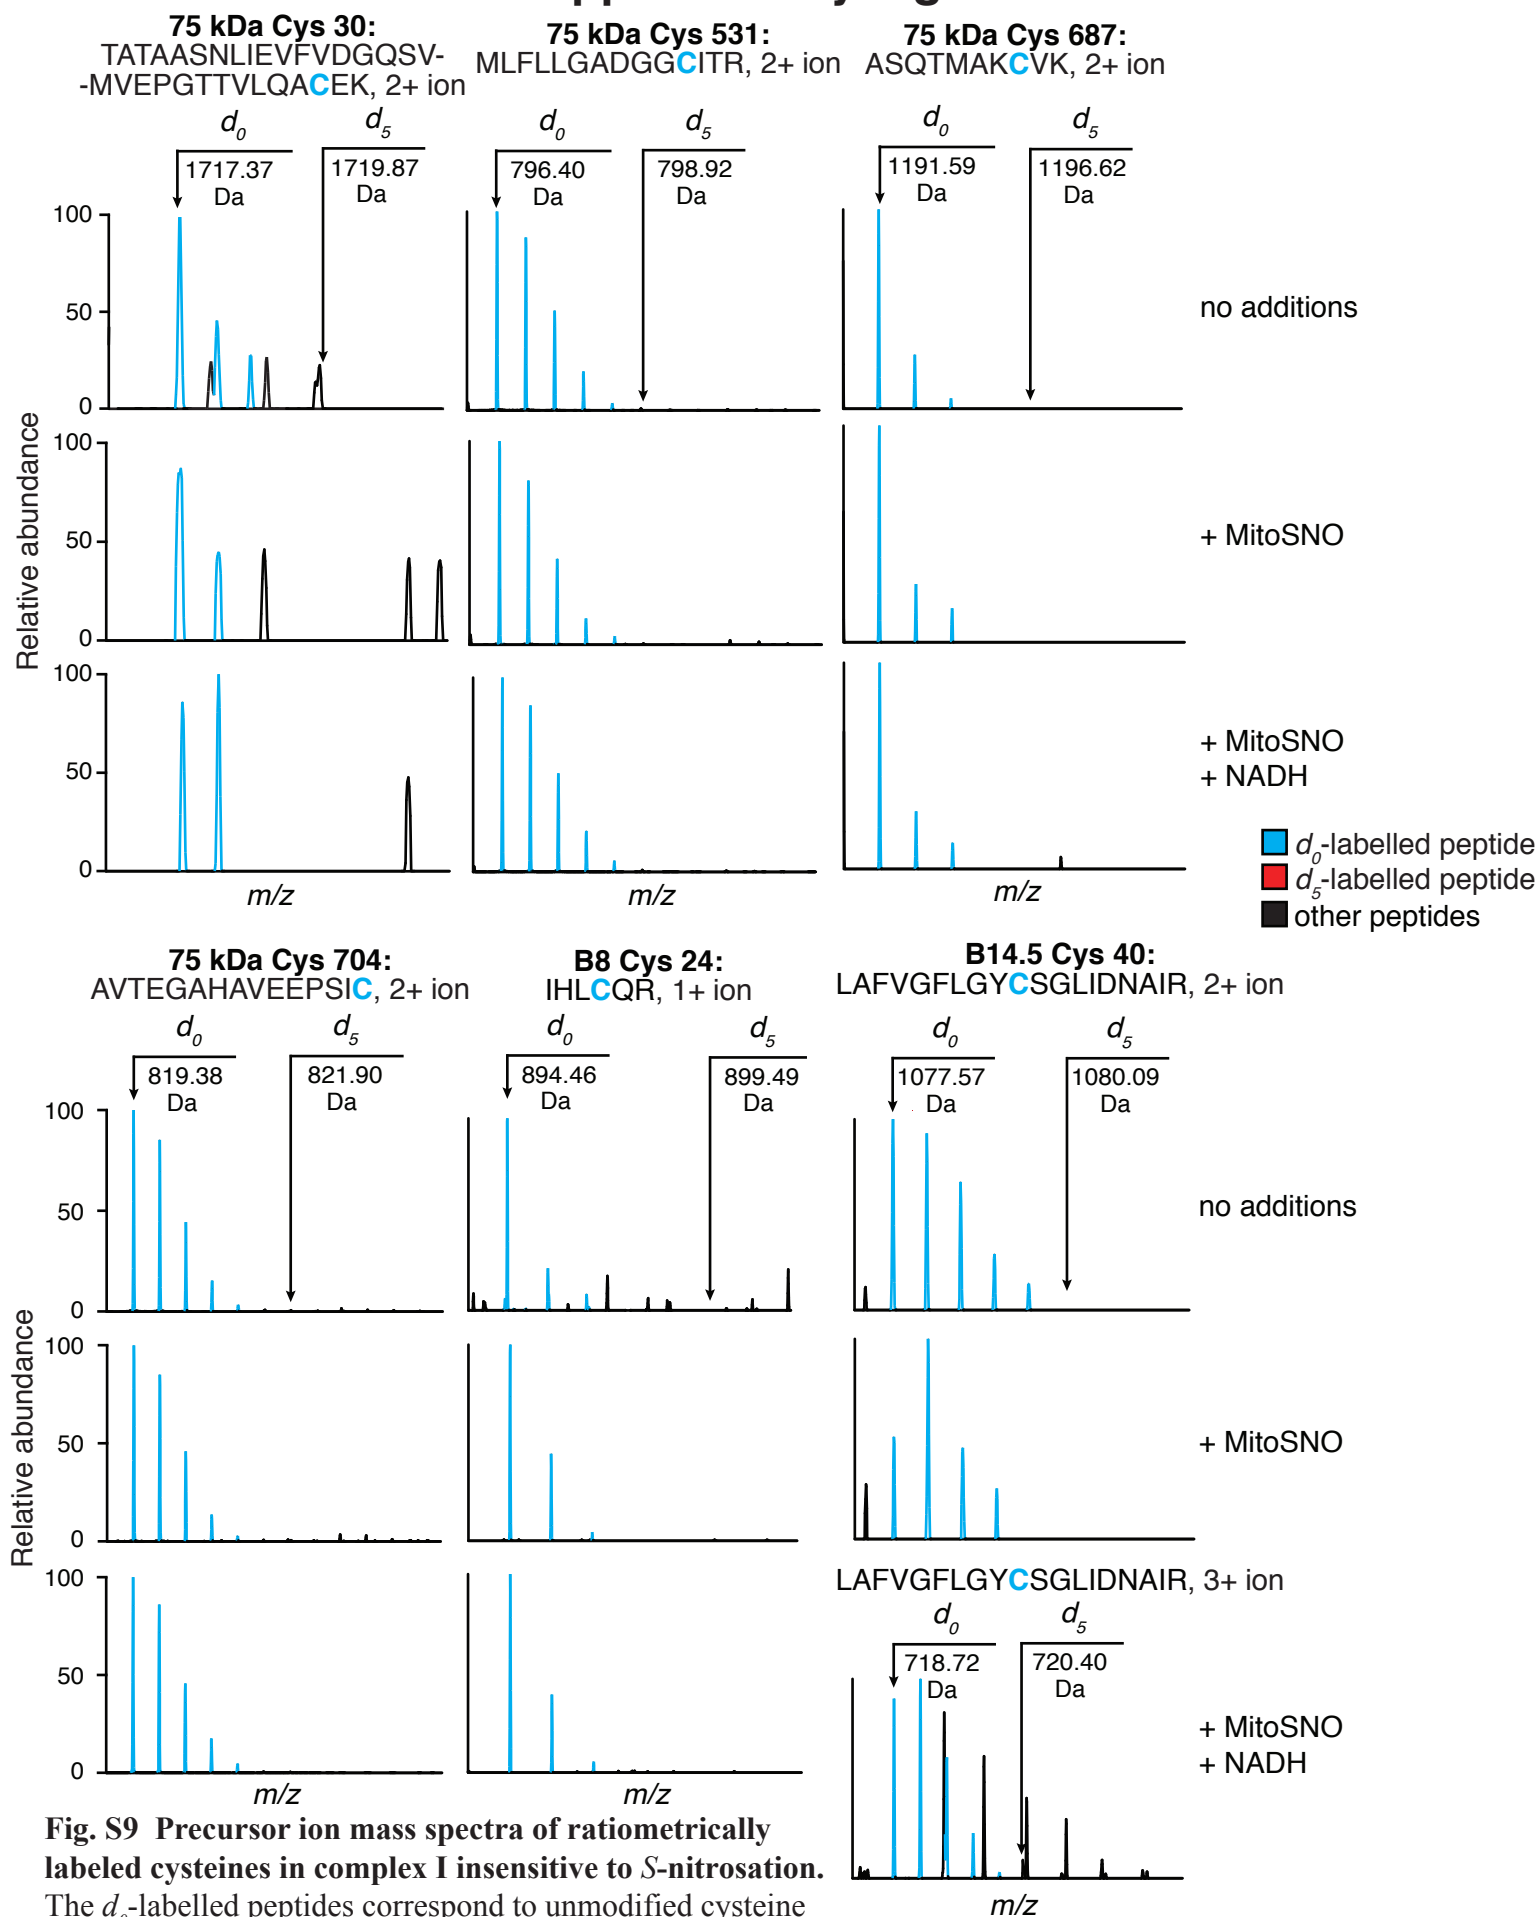

**Fig. S9 Precursor ion mass spectra of ratiometrically labeled cysteines in complex I insensitive to *S*-nitrosation.**

The  $d_0$ -labelled peptides correspond to unmodified cysteine residues and are highlighted in blue, while  $d_5$ -labelled peptides corresponding to *S*-nitrosated cysteines are highlighted in red. Relative abundance of these two forms allows for quantification of *S*-nitrosation, shown in Fig. S10.

## Supplementary Figure 10

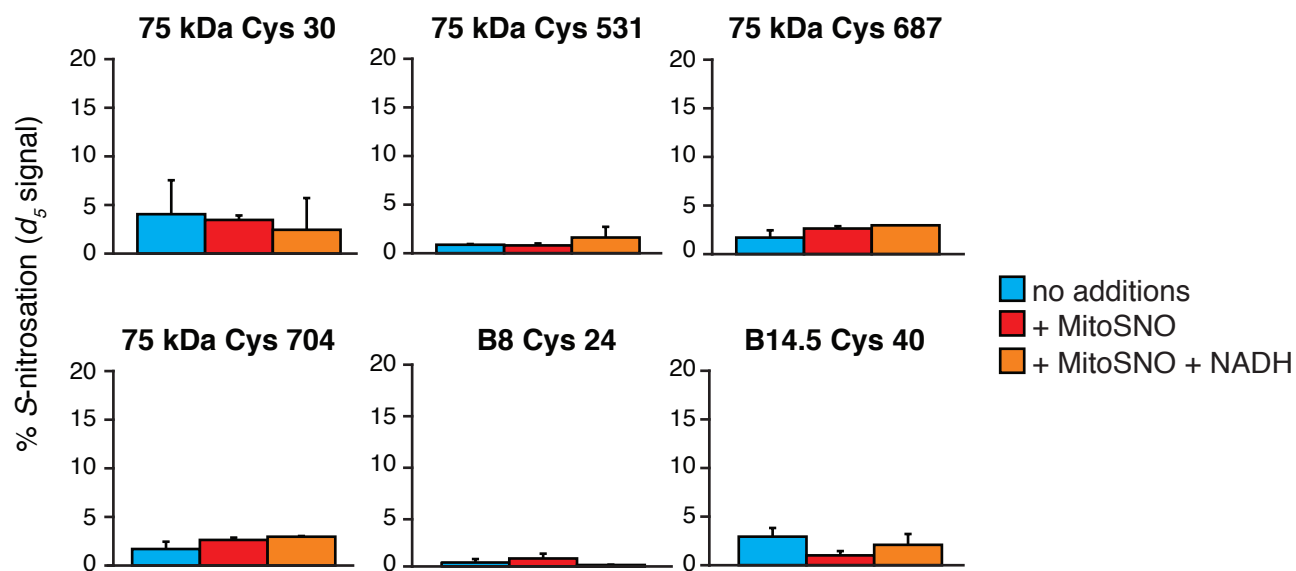

**Fig. S10 Quantification of complex I cysteine S-nitrosation.**

Ratiometric quantification of unmodified ( $d_0$ -labeled) and S-nitrosated ( $d_5$ -labeled) peptides for complex I cysteines contained within S-nitrosated subunits whose extent of S-nitrosation is insensitive to complex I activity. N = 3 for all peptides under all conditions.

## Supplementary Figure 11

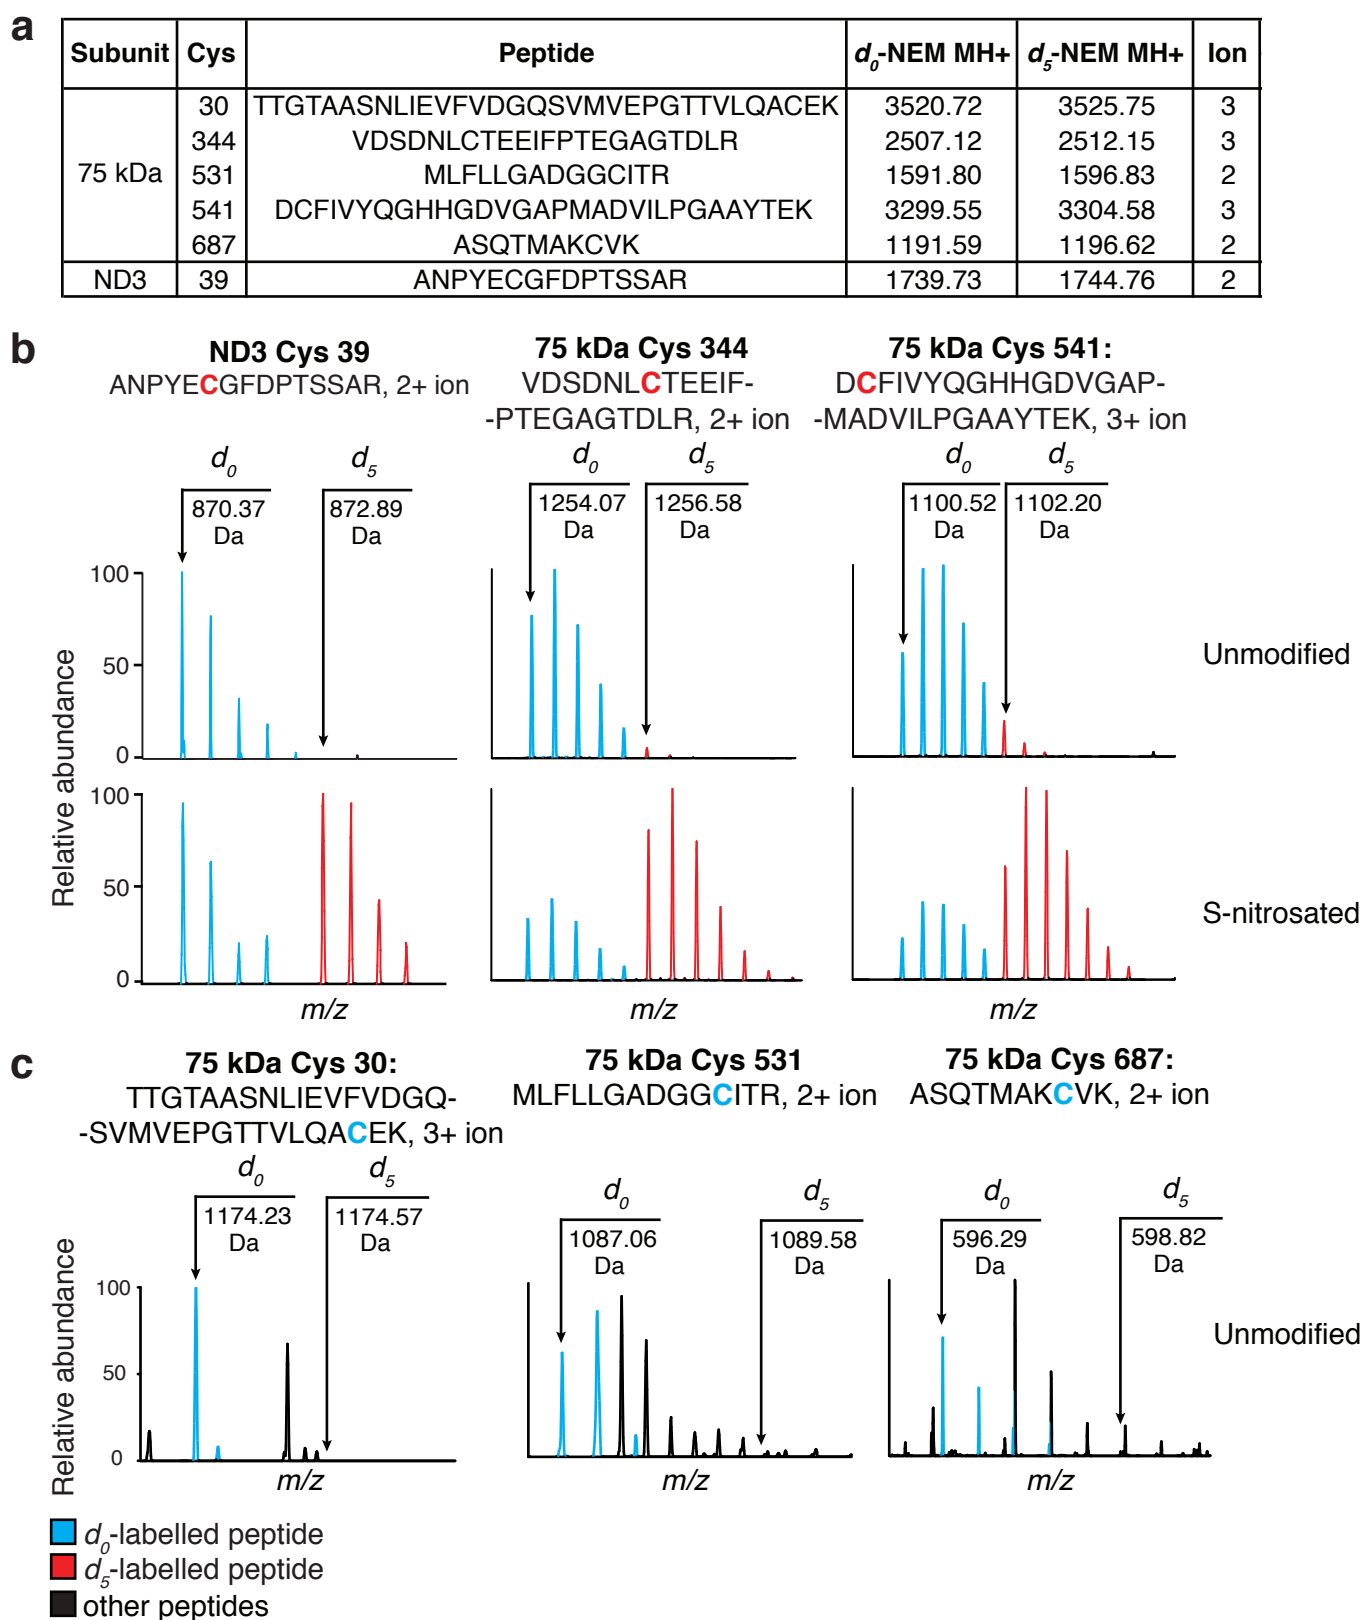

**Fig. S11 Precursor ion masses of cysteine-containing peptides within *S*-nitrosated complex I subunits analyzed following treatment of mouse hearts with MitoSNO.**

**a**, Cysteine-containing peptide sequences, masses and charges. **b**, Representative parent ion spectra of  $d_0$ -labelled (blue) and  $d_5$ -labelled (red) forms of cysteine-containing peptides sensitive to *S*-nitrosation. **c**, Representative parent ion spectra of  $d_0$ -labelled cysteine-containing peptides insensitive to *S*-nitrosation.

## Supplementary Figure 12

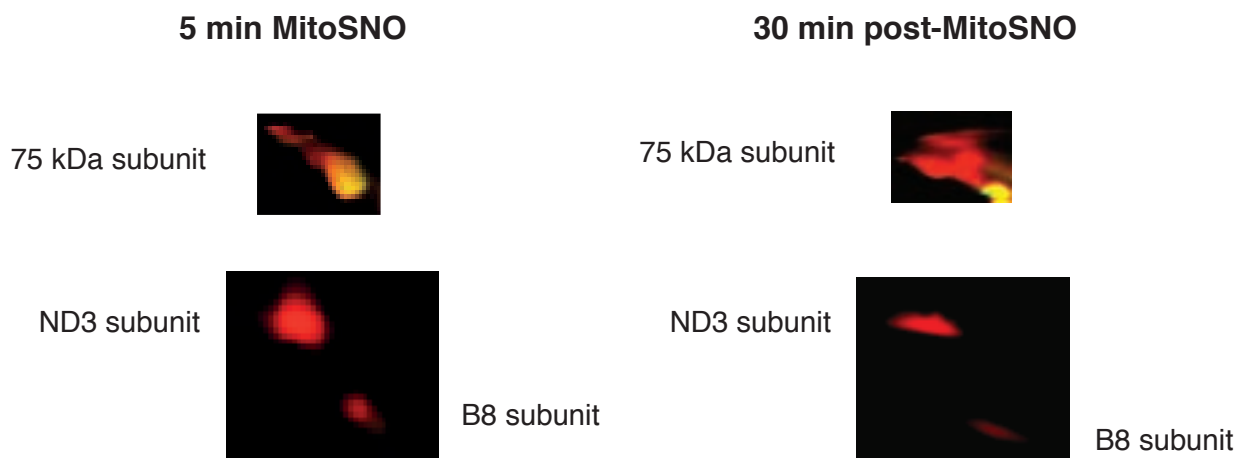

**Fig. S12 Persistence of *S*-nitrosation of complex I subunits in mitochondrial membranes.** Mitochondrial membranes containing complex I in an inactive form by incubation under anoxic conditions were incubated with MitoSNO for 5 min. The *S*-nitrosation of complex I subunits was then determined by labelling with a red fluorescent label followed by diagonal gel electrophoresis as in Fig. 2a. Relevant regions of fluorescent-scanned diagonal SDS-PAGE gel demonstrates that 30 min post *S*-nitrosation the modification of the sensitive subunits is maintained (red fluorescent spots) due to the absence of a thiol reducing system in the mitochondrial membrane incubation.

## Supplementary Figure 13

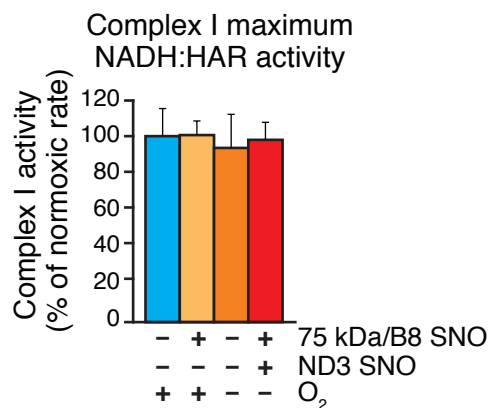

**Fig. S13 Complex I NADH:hexaammine ruthenium activity is unaffected by ND3 cysteine 39 *S*-nitrosation.**

Mitochondrial membranes were incubated under anaerobic or anoxic conditions  $\pm$  MitoSNO, leading to a range of *S*-nitrosation patterns on complex I subunits, as indicated under the bar chart. The complex I NADH:hexaammine ruthenium activity was then determined. N = 3.

## Supplementary Figure 14

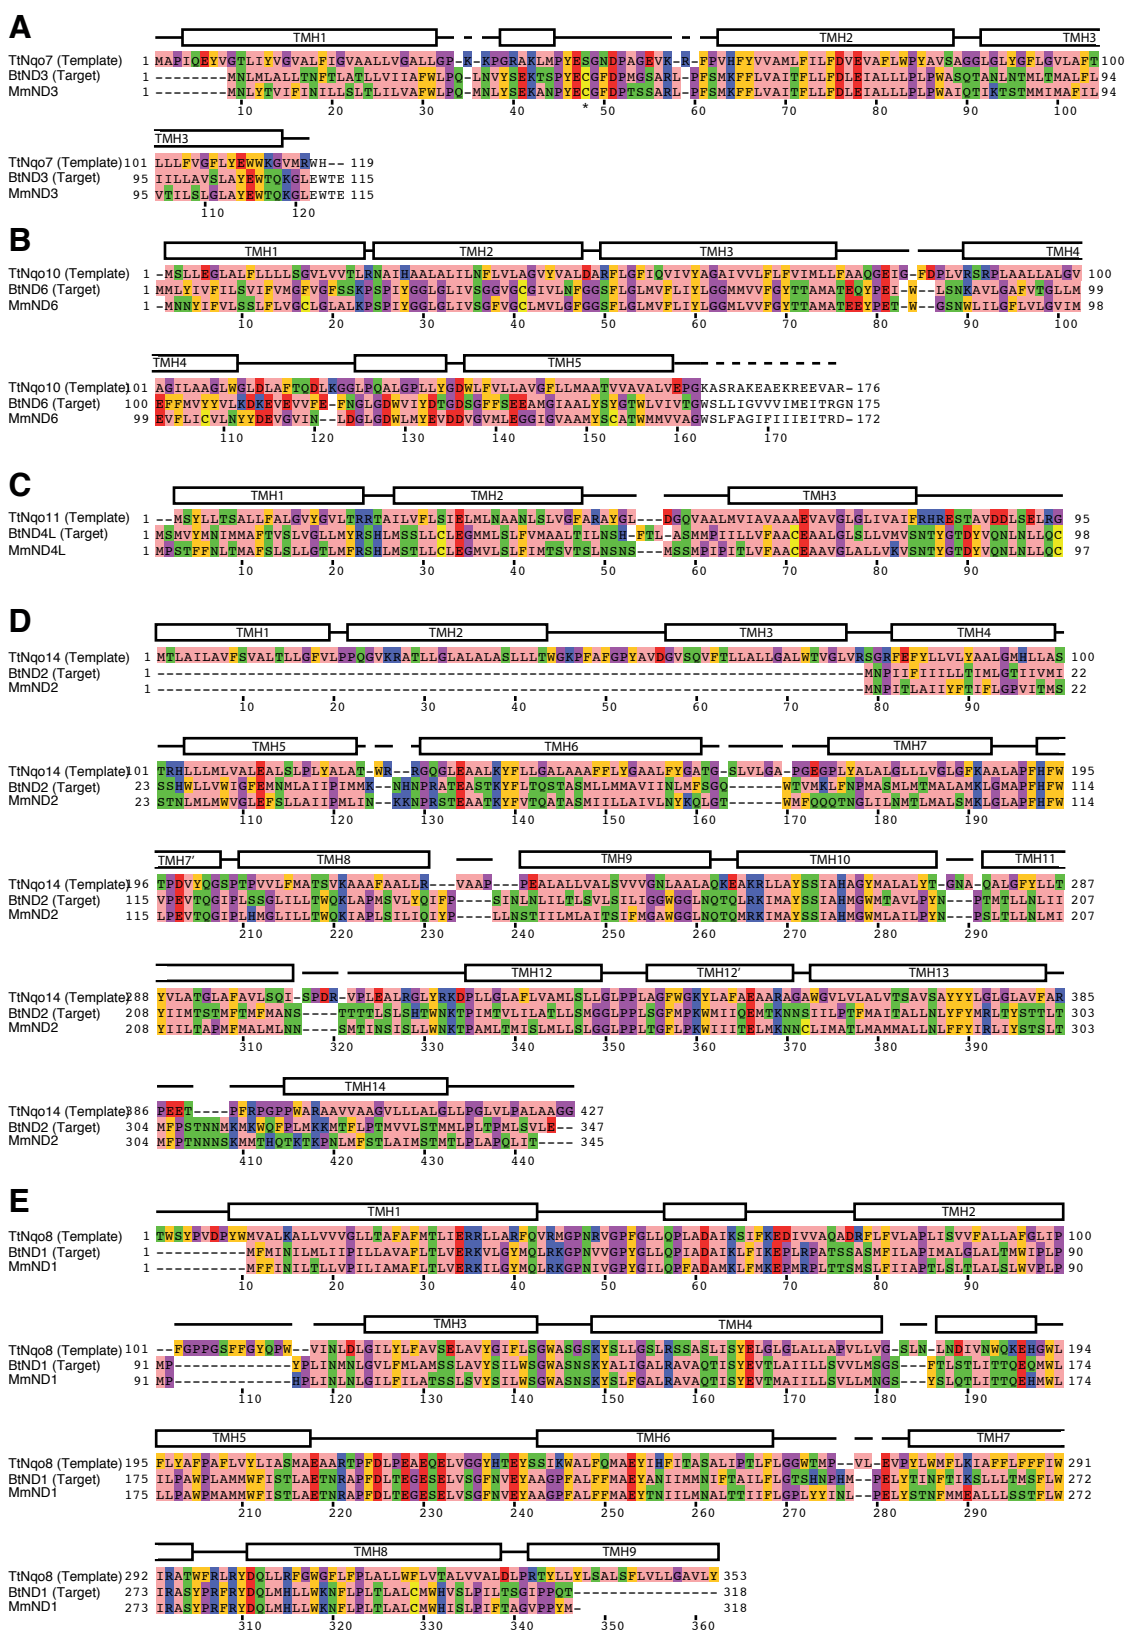

**Fig S14: Sequence alignment of complex I core hydrophobic subunits.** Pairwise sequence alignments of membrane subunits of bacterial complex I from *Thermus thermophilus* (Tt) with the orthologous sequences of mitochondrial complex I from *Bos taurus* (Bt) and *Mus musculus* (Mm). Secondary structure elements from the bacterial complex I are shown:  $\alpha$ -helices (rectangles), loops (line), and unresolved structure (dashed line). The amino acids are coloured: basic (blue), acidic (red), polar (green), aromatic (orange), aliphatic (pink), glycine and proline (magenta), and cysteine (yellow). Residues that are unresolved in the template structure (*T. thermophilus*) or not modeled in the target structure (*B. taurus*) are not colored. (a) Nqo7 and ND3 subunits. Cysteine 39 is indicated (\*). (b) Nqo10 and ND6 subunits. (c) Nqo11 and ND4L subunits. (d) Nqo14 and ND2 subunits. (e) Nqo8 and ND1 subunits.

## Supplementary Figure 15

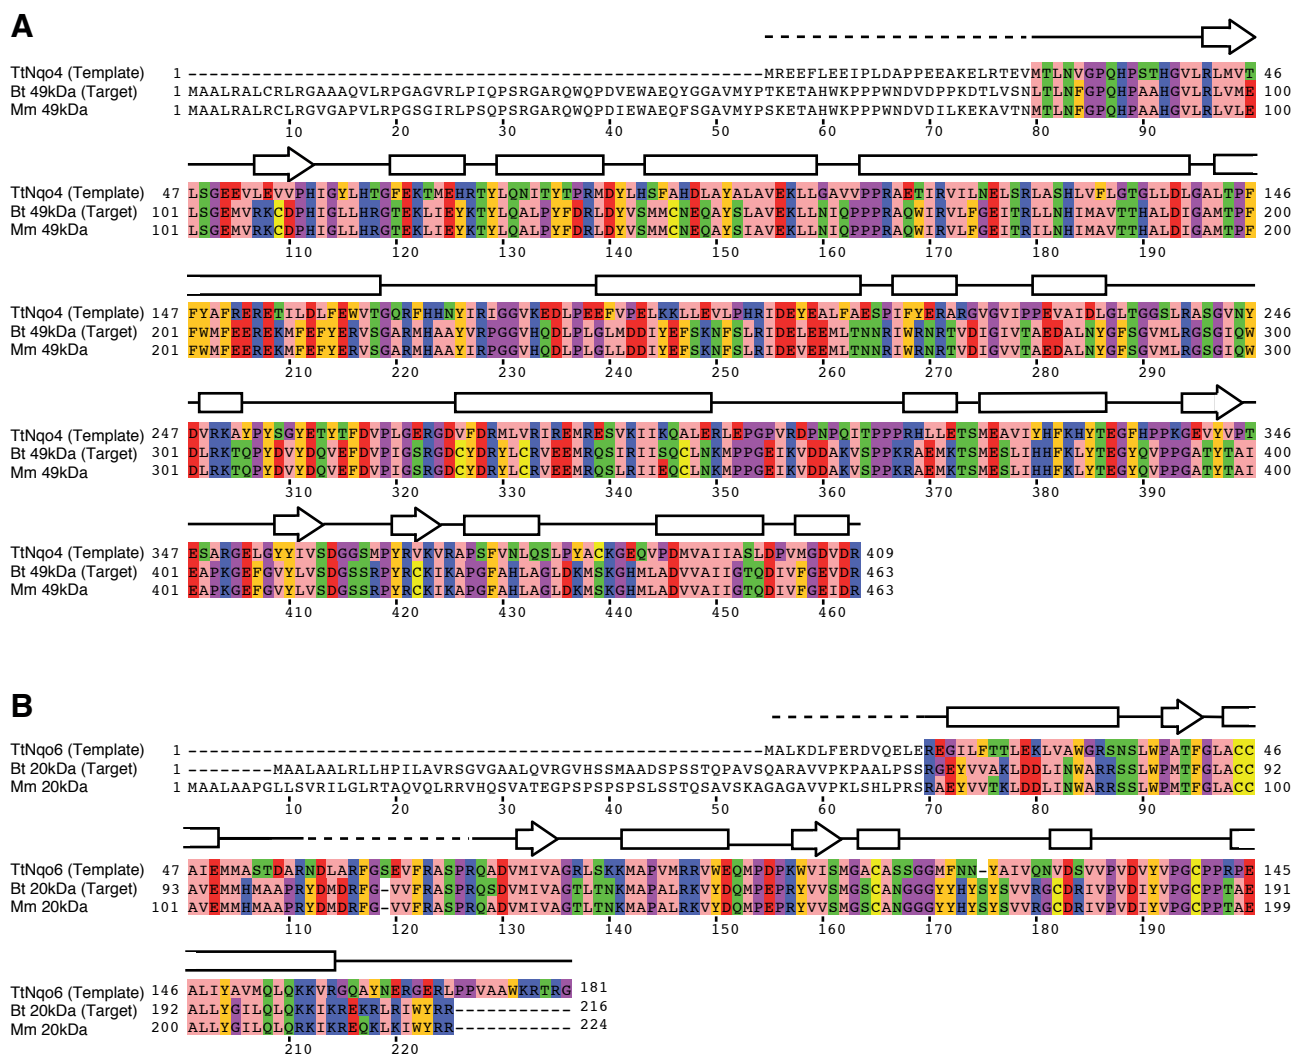

**Fig. S15: Sequence alignment of complex I core hydrophilic subunits.** Pairwise sequence alignments of hydrophilic subunits of bacterial complex I from *Thermus thermophilus* (Tt) with the orthologous sequences of mitochondrial complex I from *Bos taurus* (Bt) and *Mus musculus* (Mm). Secondary structure elements from the bacterial complex I are shown:  $\alpha$ -helices (rectangles),  $\beta$ -strands (arrows), loops (line), and unresolved structure (dashed line). The amino acids are coloured: basic (blue), acidic (red), polar (green), aromatic (orange), aliphatic (pink), glycine and proline (magenta), and cysteine (yellow). Residues that are unresolved in the template structure (*T. thermophilus*) or not modeled in the target structure (*B. taurus*) are not colored. (a) Nqo4 and 49 kDa subunits. (b) Nqo6 and 20 kDa subunit.



## Supplementary Figure 16

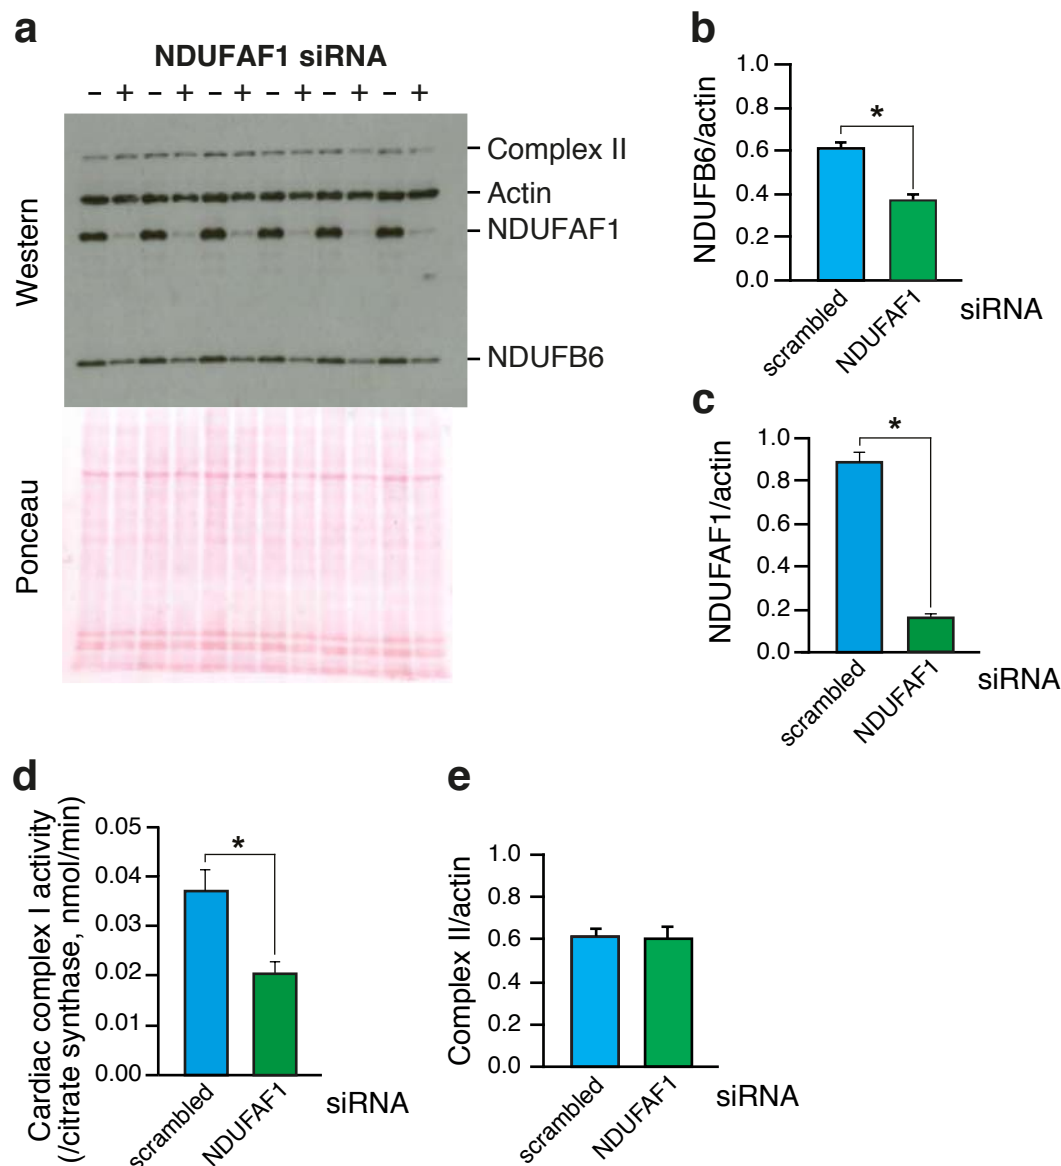

**Fig. S16 Complex I deficiency in H9C2 cells generated by siRNA knockdown of NDUFAF1.**

H9C2 cells were incubated with siRNA against NDUFAF1 or a scrambled control siRNA.

**a**, The level of expression of complex II, actin, NDUFAF1 and NDUFB6 were determined by western blotting. **b**, The level of NDUFB6 RNA relative to actin was determined by scanning densitometry. **c**, The level of complex II relative to actin was determined by scanning densitometry. N= 3, \* p < 0.05.

## Supplementary Figure 17

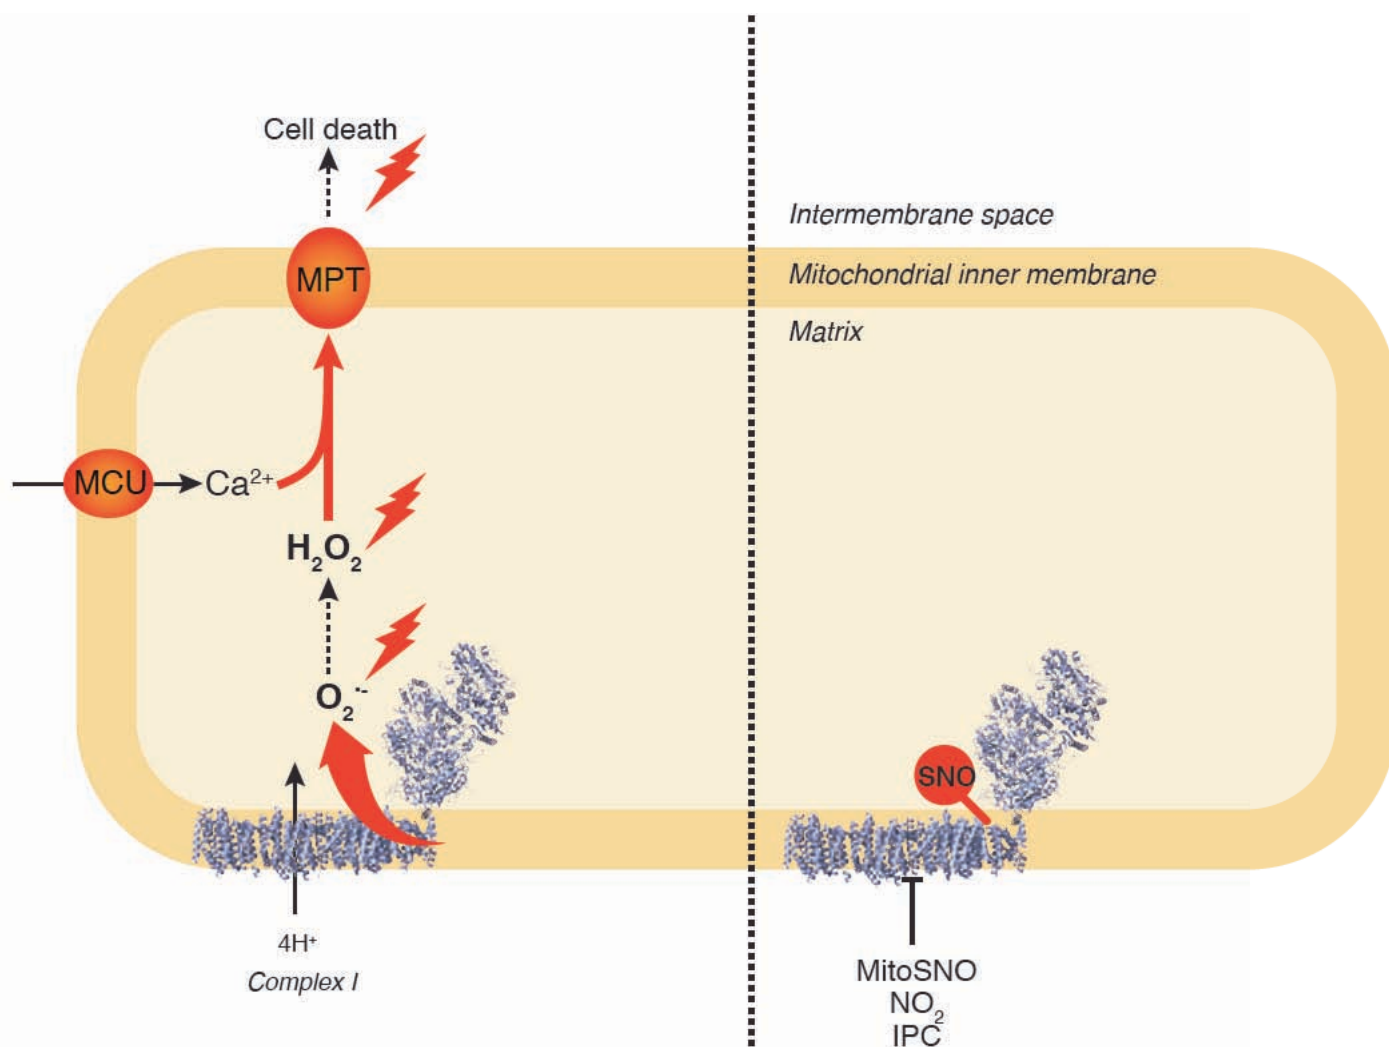

**Fig. S17 A model for the role of complex I in IR injury and the prevention of this damage by S-nitrosation.**

The left side of this schematic shows the situation during reperfusion after prolonged ischemia. In this context there is an elevated flux of mitochondrial H<sub>2</sub>O<sub>2</sub> during reperfusion. The elevated H<sub>2</sub>O<sub>2</sub> that in conjunction with the accumulation of calcium within mitochondria during ischemia goes on to induce the mitochondrial permeability transition (MPT) pore that leads to cell death. This is a major source of tissue damage in IR injury. On the right hand side of the schematic, we indicate how the conversion of complex I to its less active form by the S-nitrosation of ND3 cysteine 39 selectively decreases reverse electron transport and mitochondrial ROS production during IR injury. S-nitrosation can be brought about by MitoSNO, as shown in this work.

**Table S1. Mass spectrometric sequencing summary of isolated intact respiratory complexes**

identified as targets of *S*-nitrosation *in vivo*. a, Peptide sequencing information for 27 complex I subunits was obtained following isolation and trypsin digestion of the CI band (Fig. 2f) confirming the identity of intact respiratory complex I. b, Peptide sequencing information for 7 ATP synthase subunits was obtained following isolation and trypsin digestion of the CV band (Fig. 2f) confirming the identity of intact ATP synthase. Only MASCOT scores above a significance threshold of  $p < 0.05$  are included.

**a**

| Uniprot Accession | Subunit | Peptides matched | MASCOT score |
|-------------------|---------|------------------|--------------|
| Q9CQ75            | NDUFA2  | 6                | 211          |
| Q9CQ91            | NDUFA3  | 2                | 31           |
| Q62465            | NDUFA4  | 2                | 131          |
| Q9CPP6            | NDUFA5  | 3                | 141          |
| Q9CQZ5            | NDUFA6  | 4                | 134          |
| Q9Z1P6            | NDUFA7  | 2                | 69           |
| Q9DCJ5            | NDUFA8  | 6                | 154          |
| Q9D8B4            | NDUFA11 | 1                | 65           |
| Q7TMF3            | NDUFA12 | 2                | 53           |
| Q9ERS2            | NDUFA13 | 10               | 468          |
| Q9CPU2            | NDUFB2  | 1                | 36           |
| Q9CQZ6            | NDUFB3  | 5                | 153          |
| Q9CQC7            | NDUFB4  | 3                | 130          |
| Q9CQH3            | NDUFB5  | 5                | 164          |
| Q3UIU2            | NDUFB6  | 9                | 467          |
| Q9CR61            | NDUFB7  | 9                | 706          |
| Q9D6J5            | NDUFB8  | 8                | 420          |
| Q9DCS9            | NDUFB10 | 1                | 52           |
| O09111            | NDUFB11 | 9                | 596          |
| Q9CQ54            | NDUFC2  | 6                | 167          |
| Q91VD9            | NDUFS1  | 42               | 2407         |
| Q9CXZ1            | NDUFS4  | 2                | 58           |
| Q8BK30            | NDUFV3  | 1                | 56           |
| P03888            | ND1     | 1                | 29           |
| P03899            | ND3     | 1                | 33           |
| P03911            | ND4     | 3                | 86           |
| P03921            | ND5     | 2                | 51           |

**b**

| Uniprot Accession | Subunit         | Peptides matched | MASCOT score |
|-------------------|-----------------|------------------|--------------|
| P03930            | ATP8            | 3                | 154          |
| Q03265            | alpha subunit   | 6                | 178          |
| Q9D3D9            | delta subunit   | 2                | 145          |
| Q06185            | subunit e       | 4                | 191          |
| P56135            | subunit f       | 2                | 112          |
| Q9CPQ8            | subunit g       | 3                | 269          |
| P56382            | subunit epsilon | 2                | 34           |

**Table S2 Mass spectrometric sequencing coverage of complex I subunits containing S-nitrosated cysteines.** Samples were digested with either trypsin (T) or chymotrypsin (Ch). Only ions scores above a significance threshold of  $p < 0.05$  are included.

| Spot       | Enzyme | Uniprot accession     | Complex I subunit         | Observed (MH+) | (delta)M (ppm) | Sequence                  | Modifications                              | Ions score |
|------------|--------|-----------------------|---------------------------|----------------|----------------|---------------------------|--------------------------------------------|------------|
| 1          | T      | P15690                | 75 kDa                    | 2121.08794     | 1.05           | KTESIDVMDAVGSNIVVSTR      |                                            | 125        |
|            |        |                       |                           | 2008.98584     | 0.08           | TESIDVmDAVGSNIVVSTR       | M7(Oxidation)                              | 108        |
|            |        |                       |                           | 2137.08136     | 0.34           | KTESIDVmDAVGSNIVVSTR      | M8(Oxidation)                              | 107        |
|            |        |                       |                           | 2121.0894      | 1.74           | KTESIDVMDAVGSNIVVSTR      |                                            | 107        |
|            |        |                       |                           | 1608.78846     | 1.23           | FASEIAGVDDLGTGTR          |                                            | 106        |
|            |        |                       |                           | 2137.08339     | 1.29           | KTESIDVmDAVGSNIVVSTR      | M8(Oxidation)                              | 104        |
|            |        |                       |                           | 2008.98766     | 0.99           | TESIDVmDAVGSNIVVSTR       | M7(Oxidation)                              | 100        |
|            |        |                       |                           | 1608.78839     | 1.19           | FASEIAGVDDLGTGTR          |                                            | 95         |
|            |        |                       |                           | 1555.84455     | 0.4            | NDGAAILAAVSANIAQK         |                                            | 94         |
|            |        |                       |                           | 2137.08387     | 1.51           | KTESIDVmDAVGSNIVVSTR      | M8(Oxidation)                              | 90         |
|            |        |                       |                           | 2008.98722     | 0.77           | TESIDVmDAVGSNIVVSTR       | M7(Oxidation)                              | 90         |
|            |        |                       |                           | 1992.99365     | 1.45           | TESIDVMDAVGSNIVVSTR       |                                            | 87         |
|            |        |                       |                           | 2109.05596     | 1.24           | ALSEIAGmTLPYDTLDQVR       | M8(Oxidation)                              | 83         |
|            |        |                       |                           | 1591.80015     | 1.86           | MLFLLGADGGcITR            | C11(NEM)                                   | 82         |
|            |        |                       |                           | 2137.08318     | 1.19           | KTESIDVmDAVGSNIVVSTR      | M8(Oxidation)                              | 81         |
|            |        |                       |                           | 2093.06315     | 2.25           | ALSEIAGmTLPYDTLDQVR       |                                            | 80         |
|            |        |                       |                           | 1555.84516     | 0.79           | NDGAAILAAVSANIAQK         |                                            | 80         |
|            |        |                       |                           | 1385.71874     | 1.4            | McLVEIEKAPK               | C2(NEM)                                    | 79         |
|            |        |                       |                           | 1599.81533     | 1.7            | GLLTHTTWEDALSR            |                                            | 77         |
|            |        |                       |                           | 2109.05633     | 1.41           | ALSEIAGmTLPYDTLDQVR       | M8(Oxidation)                              | 74         |
|            |        |                       |                           | 1661.71209     | 0.5            | mHEDINEEWISDK             | M1(Oxidation)                              | 73         |
|            |        |                       |                           | 2093.06533     | 3.3            | ALSEIAGmTLPYDTLDQVR       |                                            | 73         |
|            |        |                       |                           | 1403.79208     | 1.94           | VALIGSPVDLTYR             |                                            | 73         |
|            |        |                       |                           | 2137.08318     | 1.19           | KTESIDVmDAVGSNIVVSTR      | M8(Oxidation)                              | 72         |
|            |        |                       |                           | 2168.13996     | 2.43           | ILQDIASGSHPFQVLEAK        |                                            | 72         |
|            |        |                       |                           | 2422.11315     | 2.13           | VSDTLcTEEVFPTAGAGTDLR     | C7(NEM)                                    | 71         |
|            |        |                       |                           | 2171.20896     | 0.83           | IASQVAALDLGYKPGVEAIQK     |                                            | 71         |
|            |        |                       |                           | 1645.71856     | 1.35           | MHEDINEEWISDK             |                                            | 70         |
|            |        |                       |                           | 1607.79424     | 1.32           | mLFLLGADGGcITR            | M1(Oxidation) C11(NEM)                     | 70         |
|            |        |                       |                           | 2440.1236      | 2.07           | VSDTLcTEEVFPTAGAGTDLR     | C7(NEMhyd)                                 | 70         |
|            |        |                       |                           | 1609.81056     | 1.74           | MLFLLGADGGcITR            | C11(NEMhyd)                                | 69         |
|            |        |                       |                           | 1918.86272     | 1.39           | mHEDINEEWISDKTR           | M1(Oxidation)                              | 69         |
|            |        |                       |                           | 2758.46713     | 1.76           | SNYLLNTTIAGVEEADVLLVGTNPR |                                            | 68         |
|            |        |                       |                           | 1262.63115     | 0.41           | VVAacAMPVMK               | C5(NEMhyd)                                 | 66         |
|            |        |                       |                           | 1625.80632     | 2.24           | mLFLLGADGGcITR            | M1(Oxidation) C11(NEMhyd)                  | 66         |
|            |        |                       |                           | 1244.62097     | 0.72           | VVAacAMPVMK               | C5(NEM)                                    | 65         |
|            |        |                       |                           | 1385.71794     | 0.82           | McLVEIEKAPK               | C2(NEM)                                    | 64         |
|            |        |                       |                           | 1403.79118     | 1.3            | VALIGSPVDLTYR             |                                            | 63         |
|            |        |                       |                           | 1992.99211     | 0.68           | TESIDVMDAVGSNIVVSTR       |                                            | 62         |
|            |        |                       |                           | 1655.76103     | 1.71           | AVTEGAHAVEEPSlc           | C15(NEMhyd)                                | 61         |
|            |        |                       |                           | 1370.62754     | 1.33           | GNDmQVGTYIEK              | M4(Oxidation)                              | 61         |
|            |        |                       |                           | 1403.79026     | 0.65           | VALIGSPVDLTYR             |                                            | 60         |
|            |        |                       |                           | 2109.05376     | 0.19           | ALSEIAGmTLPYDTLDQVR       | M8(Oxidation)                              | 60         |
|            |        |                       |                           | 2109.05474     | 0.66           | ALSEIAGmTLPYDTLDQVR       | M8(Oxidation)                              | 60         |
|            |        |                       |                           | 2171.20996     | 1.29           | IASQVAALDLGYKPGVEAIQK     |                                            | 59         |
|            |        |                       |                           | 2100.24884     | 2.87           | LVNQQLLADPLVPPQLTIK       |                                            | 59         |
|            |        |                       |                           | 1415.80394     | -0.03          | KPmVILGSSALQR             | M3(Oxidation)                              | 59         |
|            |        |                       |                           | 1276.61144     | 1.19           | VVAacAmPvMk               | C5(NEM) M7(Oxidation)<br>M10(Oxidation)    | 57         |
|            |        |                       |                           | 1415.80351     | -0.33          | KPmVILGSSALQR             | M3(Oxidation)                              | 57         |
|            |        |                       |                           | 1555.84731     | 2.17           | NDGAAILAAVSANIAQK         |                                            | 57         |
|            |        |                       |                           | 1260.61692     | 1.53           | VVAacAMPVmK               | C5(NEM) M10(Oxidation)                     | 56         |
|            |        |                       |                           | 1399.81028     | 0.87           | KPMVILGSSALQR             |                                            | 56         |
|            |        |                       |                           | 1370.626       | 0.21           | GNDmQVGTYIEK              | M4(Oxidation)                              | 56         |
|            |        |                       |                           | 1354.63286     | 1.52           | GNDMqVGTYIEK              |                                            | 56         |
|            |        |                       |                           | 1415.80309     | -0.63          | KPmVILGSSALQR             | M3(Oxidation)                              | 56         |
|            |        |                       |                           | 1294.62089     | 0.32           | VVAacAmPvMk               | C5(NEMhyd) M7(Oxidation)<br>M10(Oxidation) | 55         |
|            |        |                       |                           | 1294.61968     | -0.61          | VVAacAmPvMk               | C5(NEMhyd) M7(Oxidation)<br>M10(Oxidation) | 55         |
|            |        |                       |                           | 1645.71784     | 0.91           | MHEDINEEWISDK             |                                            | 54         |
| 1278.62612 | 0.44   | VVAacAMPVmK           | C5(NEMhyd) M10(Oxidation) | 54             |                |                           |                                            |            |
| 1155.63794 | 0.92   | LEEVSPNLVR            |                           | 54             |                |                           |                                            |            |
| 800.44611  | 1.67   | VGMQIPR               |                           | 53             |                |                           |                                            |            |
| 2171.21047 | 1.53   | IASQVAALDLGYKPGVEAIQK |                           | 53             |                |                           |                                            |            |
| 1244.62041 | 0.27   | VVAacAMPVMK           | C5(NEM)                   | 53             |                |                           |                                            |            |
| 1260.61659 | 1.27   | VVAacAmPVMK           | C5(NEM) M7(Oxidation)     | 53             |                |                           |                                            |            |
| 1425.78293 | 1.41   | NRLEEVSPNLVR          |                           | 52             |                |                           |                                            |            |
| 1637.74994 | 1.4    | AVTEGAHAVEEPSlc       | C15(NEM)                  | 51             |                |                           |                                            |            |
| 882.4987   | 0.95   | VMNILHR               |                           | 50             |                |                           |                                            |            |
| 1234.54419 | 2.65   | DFYMTDSISR            |                           | 50             |                |                           |                                            |            |
| 1097.52375 | 1.4    | SATYVNTTEGR           |                           | 50             |                |                           |                                            |            |
| 2109.05612 | 1.31   | ALSEIAGmTLPYDTLDQVR   | M8(Oxidation)             | 49             |                |                           |                                            |            |
| 1902.86835 | 1.69   | MHEDINEEWISDKTR       |                           | 49             |                |                           |                                            |            |

Table S2 (continued)

| Spot       | Enzyme | Uniprot accession   | Complex I subunit                       | Observed (MH+) | (delta)M (ppm) | Sequence                         | Modifications              | Ions score |
|------------|--------|---------------------|-----------------------------------------|----------------|----------------|----------------------------------|----------------------------|------------|
| 1          | T      | P15690              | 75 kDa                                  | 1250.53826     | 1.94           | DFYmTDSISR                       | M4(Oxidation)              | 49         |
|            |        |                     |                                         | 2137.08329     | 1.24           | KTESIDVmDAVGSNIVVSTR             | M8(Oxidation)              | 49         |
|            |        |                     |                                         | 2137.08469     | 1.89           | KTESIDVmDAVGSNIVVSTR             | M8(Oxidation)              | 49         |
|            |        |                     |                                         | 2958.56354     | 0.97           | VAGmLQSFQGNDAIAGGLVDAEALIA<br>LK | M4(Oxidation)              | 48         |
|            |        |                     |                                         | 1655.75866     | 0.28           | AVTEGAHAVEEPSIc                  | C15(NEMhyd)                | 48         |
|            |        |                     |                                         | 1555.84636     | 1.56           | NDGAAILAAVSNIQAK                 |                            | 48         |
|            |        |                     |                                         | 1064.55303     | 0.58           | FEAPLFNAR                        |                            | 47         |
|            |        |                     |                                         | 1415.80509     | 0.79           | KPmVILGSSALQR                    | M3(Oxidation)              | 47         |
|            |        |                     |                                         | 2093.06135     | 1.4            | ALSEIAGMTLPYDTLDQVR              |                            | 46         |
|            |        |                     |                                         | 1625.80425     | 0.97           | mLFLLGADGGcITR                   |                            | 46         |
|            |        |                     |                                         | 969.51573      | 0.46           | FAYDGLKR                         |                            | 46         |
|            |        |                     |                                         | 1031.47976     | 0.47           | YDHLGDSPK                        |                            | 46         |
|            |        |                     |                                         | 816.44109      | 1.72           | VGmQIPR                          | M3(Oxidation)              | 46         |
|            |        |                     |                                         | 1419.72335     | 0.75           | mcLVEIEKAPK                      | M1(Oxidation) C2(NEMhyd)   | 45         |
|            |        |                     |                                         | 2422.11221     | 1.74           | VSDTLcTEEVFPATAGAGTDLR           | C7(NEM)                    | 45         |
|            |        |                     |                                         | 1031.47981     | 0.51           | YDHLGDSPK                        |                            | 45         |
|            |        |                     |                                         | 2121.08823     | 1.18           | KTESIDVMDAVGSNIVVSTR             |                            | 44         |
|            |        |                     |                                         | 1294.62094     | 0.36           | VVAAcAmPVmK                      |                            | 44         |
|            |        |                     |                                         | 3033.44933     | 0.73           | DLNLRVSDTLcTEEVFPATAGAGTDLR      | M10(Oxidation)<br>C12(NEM) | 44         |
|            |        |                     |                                         | 898.49323      | 0.5            | VmNILHR                          | M2(Oxidation)              | 44         |
|            |        |                     |                                         | 882.49751      | -0.4           | VMNILHR                          |                            | 44         |
|            |        |                     |                                         | 1260.61503     | 0.03           | VVAAcAMPVmK                      | C5(NEM) M10(Oxidation)     | 43         |
|            |        |                     |                                         | 944.46135      | -0.55          | LSVAGNcR                         | C7(NEM)                    | 43         |
| 2100.24479 | 0.95   | LVNQQLLADPLVPPQLTIK |                                         | 42             |                |                                  |                            |            |
| 1276.61081 | 0.7    | VVAAcAmPVmK         | C5(NEM) M7(Oxidation)<br>M10(Oxidation) | 42             |                |                                  |                            |            |
| 1637.74849 | 0.51   | AVTEGAHAVEEPSIc     | C15(NEM)                                | 42             |                |                                  |                            |            |
| 2168.14267 | 3.68   | ILQDIASGSHPFSQLQEAK |                                         | 42             |                |                                  |                            |            |
| 2          | Ch     | P03898              | ND3                                     | 861.44978      | 3.09           | TQKGLEW                          |                            | 49         |
|            |        |                     |                                         | 1176.57256     | 3.49           | EWTQKGLEW                        |                            | 44         |
|            |        |                     |                                         | 1106.53411     | 3.73           | DPmGSARLPF                       | M3(Oxidation)              | 44         |
|            |        |                     |                                         | 861.44921      | 3.1            | EWTQKGL                          |                            | 42         |
|            |        |                     |                                         | 1406.66411     | 3.82           | EWTQKGLEWTE                      |                            | 31         |
|            |        |                     |                                         | 811.3856       | 2.91           | SEKTSKY                          |                            | 30         |
|            |        |                     |                                         | 1091.54018     | 3.77           | TQKGLEWTE                        |                            | 22         |
| 3          | Ch     | Q02827              | 14.5b                                   | 1345.6576      | 2.98           | GEVFEEFHPVR                      |                            | 41         |
|            |        |                     |                                         | 1006.44396     | 2.8            | AVRDHDmF                         | M7(Oxidation)              | 38         |
| 4          | Ch     | Q02370              | B8                                      | 1415.75426     | 3.75           | SADQVTRALENVL                    |                            | 46         |
|            |        |                     |                                         | 960.51319      | 2.35           | SADQVTRAL                        |                            | 39         |
|            |        |                     |                                         | 1467.72966     | 4.72           | AFGQEKNVSLNNF                    |                            | 32         |
| 4          | Ch     | Q02365              | B12                                     | 1584.89054     | 3.88           | KIEGTPLETVQEKL                   |                            | 48         |
|            |        |                     |                                         | 846.45951      | 3.25           | ETVQEKL                          |                            | 40         |
| 5          | T      | P25708              | 51 kDa                                  | 1710.84922     | 2.68           | GEFYNEASNLRQVAIR                 |                            | 74         |
|            |        |                     |                                         | 1382.6974      | 4.55           | KTSFGSLKDEDR                     |                            | 56         |
|            |        |                     |                                         | 1778.82958     | 4.52           | NAcGSGYDFDFVVR                   | C3(NEMhyd)                 | 51         |
|            |        |                     |                                         | 1212.61808     | 4.97           | HFRPELEER                        |                            | 44         |
|            |        |                     |                                         | 1055.50881     | 2.85           | GGAWFASFGR                       |                            | 41         |
|            |        |                     |                                         | 983.53478      | 3.92           | IFTNLYGR                         |                            | 41         |
|            |        |                     |                                         | 1372.6576      | 2.67           | MQQFAQQHQR                       |                            | 40         |
|            |        |                     |                                         | 1254.60066     | 3.61           | TSGSLKDEDR                       |                            | 39         |
|            |        |                     |                                         | 978.43785      | 2.91           | EGVDWMNK                         |                            | 37         |
|            |        |                     |                                         | 1050.54729     | 0.61           | EAYEAGLIGK                       |                            | 37         |
|            |        |                     |                                         | 2614.41275     | 5.3            | HAGGVTGGWDNLLAVIPGGSSTPLIPK      |                            | 35         |
|            |        |                     |                                         | 1388.65281     | 2.85           | mQQFAQQHQR                       | M1(Oxidation)              | 35         |
|            |        |                     |                                         | 1212.61729     | 4.32           | HFRPELEER                        |                            | 25         |

**Table S3 Mass spectrometric sequencing coverage of all cysteine-containing peptides within complex I subunits sensitive to S-nitrosation in their  $d_0$ -labelled form only (insensitive cysteines), or both  $d_0$ -labelled and  $d_5$ -labelled forms (sensitive to S-nitrosation) digested with trypsin.**

Mass spectrometric sequencing data from membrane experiments using bovine material, as well as *in vivo* experiments using rat and mouse material are included. Only ions scores above the significance threshold of  $p < 0.05$  are included. 75 kDa Cys 30 and Cys 687 were not sequenced, and identification in these cases was based on peptide mass fingerprinting alone.

| Species    | CI Subunit | Cys | Sequence                        | Modification | Theoretical mass | Measured mass | Expectation score | (delta)M (ppm) | Ions score | MS2 ions matched |
|------------|------------|-----|---------------------------------|--------------|------------------|---------------|-------------------|----------------|------------|------------------|
| Bovine     | 75 kDa     | 344 | DLLNRVSDTLCTEEVFPTAGAGTDLR      | NEM          | 3033.4500        | 3033.4520     | 2.10E-06          | 1.60           | 64         | 22               |
|            |            | 344 | DLLNRVSDTLCTEEVFPTAGAGTDLR      | NEMhyd       | 3051.4577        | 3051.4634     | 4.30E-04          | 1.88           | 41         | 20               |
|            |            | 344 | DLLNRVSDTLCTEEVFPTAGAGTDLR      | d5-NEM       | 3038.4800        | 3038.4955     | 2.70E-03          | 5.60           | 44         | 16               |
|            |            | 344 | VSDTLCTEEVFPTAGAGTDLR           | NEM          | 2422.1100        | 2422.1183     | 2.40E-02          | 4.25           | 34         | 6                |
|            |            | 344 | VSDTLCTEEVFPTAGAGTDLR           | d5-NEM       | 2427.1400        | 2427.1524     | 1.10E-05          | 5.38           | 68         | 11               |
|            |            | 344 | VSDTLCTEEVFPTAGAGTDLR           | d5-NEMhyd    | 2445.1499        | 2445.1582     | 3.90E-04          | 3.40           | 53         | 8                |
|            |            | 531 | MLFLLGADGGCITR                  | NEM          | 1591.8000        | 1591.8051     | 4.90E-11          | 5.00           | 120        | 12               |
|            |            | 531 | MLFLLGADGGCITR                  | NEM, mOx     | 1607.7913        | 1607.8006     | 3.40E-06          | 5.42           | 33         | 15               |
|            |            | 531 | MLFLLGADGGCITR                  | NEMhyd       | 1609.8033        | 1609.8145     | 2.30E-05          | 4.19           | 63         | 10               |
|            |            | 531 | MLFLLGADGGCITR                  | NEMhyd, mOx  | 1625.8027        | 1625.8095     | 4.20E-05          | 4.20           | 61         | 10               |
|            |            | 541 | DCFIVYQGHGHDVVGAPIADVILPGAAYTEK | NEM          | 3281.5900        | 3281.6000     | 1.10E-05          | 1.93           | 56         | 22               |
|            |            | 541 | DCFIVYQGHGHDVVGAPIADVILPGAAYTEK | d5-NEM       | 3286.6200        | 3286.6428     | 6.70E-04          | 5.38           | 50         | 24               |
|            |            | 541 | DCFIVYQGHGHDVVGAPIADVILPGAAYTEK | NEMhyd       | 3299.6040        | 3299.6085     | 8.60E-03          | 1.28           | 28         | 27               |
|            |            | 704 | AVTEGAHAVEEPSIC                 | NEM          | 1637.7476        | 1637.7545     | 1.20E-03          | 4.21           | 45         | 6                |
|            |            | 704 | AVTEGAHAVEEPSIC                 | NEMhyd       | 1655.7582        | 1655.7632     | 1.40E-03          | 3.00           | 45         | 21               |
| Bovine     | ND3        | 39  | TSPYECGFDPMG SAR                | NEM          | 1742.7200        | 1742.7140     | 2.80E-04          | -0.53          | 63         | 18               |
|            |            | 39  | TSPYECGFDPMG SAR                | NEMhyd, mOx  | 1776.7205        | 1776.7197     | 1.70E-03          | -0.44          | 55         | 7                |
|            |            | 39  | TSPYECGFDPMG SAR                | NEM, mOx     | 1758.7099        | 1758.7094     | 1.10E-03          | -0.28          | 56         | 10               |
| Bovine     | B8         | 24  | IHL CQR                         | NEM          | 894.4618         | 894.4601      | 1.00E+00          | -1.51          | 16         | 7                |
|            |            | 58  | ECSDVQPK                        | NEM          | 1030.4513        | 1030.4505     | 3.40E-03          | -0.49          | 34         | 7                |
| Mouse      | 75 kDa     | 344 | VSDNLCTEEIFPTEGAGTDLR           | NEM          | 2507.1200        | 2507.1276     | 3.80E-10          | 1.27           | 107        | 11               |
|            |            | 344 | VSDNLCTEEIFPTEGAGTDLR           | d5-NEM       | 2512.1500        | 2512.1589     | 3.90E-10          | 1.26           | 107        | 11               |
|            |            | 531 | MLFLLGADGGCITR                  | NEM          | 1591.8000        | 1591.7974     | 1.50E-05          | 0.14           | 62         | 13               |
|            |            | 531 | MLFLLGADGGCITR                  | NEM, mOx     | 1607.7900        | 1607.7917     | 4.90E-08          | -0.29          | 86         | 12               |
|            |            | 541 | DCFIVYQGHGHDVVGAPMADVILPGAAYTEK | NEM          | 3299.5500        | 3299.5557     | 9.50E-09          | 1.69           | 94         | 26               |
|            |            | 541 | DCFIVYQGHGHDVVGAPMADVILPGAAYTEK | d5-NEM       | 3304.5800        | 3304.5874     | 1.80E-07          | 1.78           | 81         | 16               |
| Rat, mouse | ND3        | 39  | ANPYECGFDP TSSAR                | NEM          | 1739.7300        | 1739.7364     | 9.10E-08          | 1.90           | 82         | 9                |
|            |            | 39  | ANPYECGFDP TSSAR                | d5-NEM       | 1744.7600        | 1744.7647     | 7.40E-05          | 0.16           | 54         | 13               |

**Table S4: The percentage S-nitrosation of sensitive complex I cysteines within the intact heart during normoxia and ischemia ± MitoSNO.**  $n = 3-6$  for all conditions, \*  $P < 0.05$ , \*\*  $P < 0.01$ , versus normoxia untreated.

| Subunit | Cys | Normoxia    |               | Ischemia    |                |
|---------|-----|-------------|---------------|-------------|----------------|
|         |     | Untreated   | MitoSNO       | Untreated   | MitoSNO        |
| 75 kDa  | 30  | < 1.9 ± 1.7 | < 2.6 ± 1.2   | < 2.3 ± 2.1 | < 3.7 ± 3.2    |
|         | 344 | < 1.9 ± 1.6 | 37.2 ± 8.0 ** | 5.8 ± 0.7 * | 18.8 ± 5.9 **  |
|         | 531 | < 3.6 ± 1.3 | < 1.7 ± 1.0   | < 3.3 ± 1.1 | < 1.5 ± 0.9    |
|         | 541 | < 0.9 ± 0.4 | 44.5 ± 8.7 ** | < 4.8 ± 2.1 | 45.1 ± 11.2 ** |
|         | 687 | < 0.9 ± 0.9 | < 2.8 ± 1.5   | < 1.9 ± 0.7 | < 0.9 ± 0.7    |
| ND3     | 39  | < 0.4 ± 0.2 | < 3.3 ± 1.8   | 4.1 ± 2.2 * | 37.8 ± 6.5 **  |

% S-nitrosation

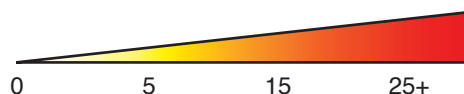

**Table S5: Mass spectrometric sequencing identification of the Cys39 containing tryptic peptide of the ND3 subunit from *in vivo* gel experiments.** For gel based experiments where ND3 S-nitrosation was studied by tagging with maleimide fluorophores, presence of the ND3 subunit was confirmed by MS sequencing of the ND3 Cys39 containing peptide. Representative sequencing data from these experiments are shown below. Only ions scores above the significance threshold of  $p < 0.05$  are included.

| Sequence        | Modification | Theoretical mass | Measured mass | Expectation score | (delta)M (ppm) | Ions score | Ions matched | Reference exp |
|-----------------|--------------|------------------|---------------|-------------------|----------------|------------|--------------|---------------|
| ANPYECGFDPTSSAR | NEM          | 1739.7300        | 1739.7326     | 1.00E-02          | -0.26          | 33         | 7            | Fig. 3b       |
| ANPYECGFDPTSSAR | NEM          | 1739.7300        | 1739.7305     | 9.50E-06          | -1.45          | 63         | 8            | Fig. 3c       |
| ANPYECGFDPTSSAR | NEM          | 1739.7300        | 1739.7313     | 8.40E-04          | -1.03          | 44         | 8            | Fig. 3c       |
| ANPYECGFDPTSSAR | NEM          | 1739.7300        | 1739.7321     | 5.70E-05          | -0.54          | 56         | 7            | Fig. 4b       |
| ANPYECGFDPTSSAR | NEM          | 1739.7300        | 1739.7344     | 3.00E-02          | 0.79           | 29         | 10           | Fig. 4b       |

**Table S6: Ratiometric labeling of complex I cysteine S-nitrosothiols with  $d_5$ -NEM in hearts subjected to IPC.**  $n = 3-6$  for all conditions, \*  $P < 0.05$ , \*\*  $P < 0.01$ , versus normoxia untreated.

| Subunit | Cys | Untreated   | IPC            |
|---------|-----|-------------|----------------|
| 75 kDa  | 30  | < 1.9 ± 1.7 | < 1.1 ± 0.6    |
|         | 344 | < 1.9 ± 1.6 | 33.2 ± 13.6 ** |
|         | 531 | < 3.6 ± 1.3 | < 2.5 ± 0.8    |
|         | 541 | < 0.9 ± 0.4 | 48.5 ± 22.9 *  |
|         | 687 | < 0.9 ± 0.9 | < 1.2 ± 1.0    |
| ND3     | 39  | < 0.4 ± 0.2 | 21.1 ± 8.9 *   |

% S-nitrosation

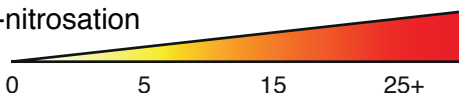

## SUPPLEMENTARY METHODS

***In vivo* treatments.** To assess the effects of MitoSNO on hemodynamics, mice were placed in a Plexiglass induction chamber filled with 3% isoflurane in O<sub>2</sub>. Adequacy of anesthesia was confirmed through testing of the pedal reflex. Animals were moved to a warmed surgical platform, intubated and ventilated with 2% isoflurane in O<sub>2</sub> (0.125 ml tidal volume, 240 breaths/min) using a positive end-expiratory pressure ventilator (Hugo Sachs Elektronik-Harvard Apparatus, Germany). Body temperature was monitored using a rectal thermometer and maintained at 37°C via an animal temperature controller (TCAT-2LV, Physitemp, USA). The left ventricle was catheterized with a 1.2 F Pressure Conductance Catheter (SciSense Inc., Canada) in a closed-chest approach as described previously<sup>1</sup>. Briefly, using a dissection microscope (Mantis Compact, Vision Engineering, UK) a small mid-line incision was made in the neck and the right carotid artery was exposed and isolated from the vagus nerve. A 4/0 USP suture was secured tightly around the proximal end of the artery. A second suture was placed loosely at the distal end of the arterial section and a vascular clamp (0.4-1 mm) fixed close to the distal suture to minimize blood loss. A small incision was made near the proximal end of the artery with microincision scissors, and the pressure catheter inserted into the vessel. The catheter was then extended down into the left ventricle such that it lay parallel to the long axis and positioned until good peaks were observed. Data output was via a FV896B rodent pressure-volume control unit (SciSense Inc., Canada) and laptop using LabScribe2 software (SciSense Inc., Canada). Following left ventricular catheterization, hemodynamics were allowed to stabilize for 15 min before a 100 µl bolus of either vehicle or drug solution was given as an intravenous (IV) injection into the tail vein. Parameters including heart rate, left ventricular pressure (LVP),  $dP/dt_{max}$  and  $dP/dt_{min}$  (maximum and minimum rate of pressure change in the left ventricle over time; indices of ventricular performance), were recorded for a further 15 min. A section of ten stable pressure peaks were selected and averaged to determine mean basal values. Further sections were selected as close to indicated time points as possible post IV injection (30 s, 1, 2, 3, 4, 5, 10 and 15 min). In the case of an unstable period of peaks, a larger section of data was selected for averaging. Results are expressed as a mean percentage change in relation to basal values unless otherwise stated. Animals with a  $dP/dt_{max}$  of <5000 mm Hg/s following the stabilization period or animals in which hemodynamics were not sufficiently stable to determine basal values were excluded. All animals were sacrificed upon completion of the experimental protocol via cervical dislocation.

**Fractionation of myocardial cytosolic fraction.** Cytosolic proteins from myocardial tissue was isolated using Qproteome Cell Compartment Kit (Qiagen) according to the manufacturer's instructions. All buffers were supplemented with 100 mM NEM and fractionation was performed in the dark.

**Measurement of ATP synthase activity.** Following treatments (control, 75 µM MitoSNO, or 50 mM NEM), mitochondrial membranes containing 200 µg protein were washed in 10 mM HEPES, 120 mM KCl, 1 mM EDTA, 1 mM DTPA, and 10 µM neocuproine, pH 7.4, before resuspension in assay buffer consisting of 100 mM Tris, 50 mM KCl, 2 mM MgCl<sub>2</sub>, 0.2 mM EDTA, pH 8 (HCl). ATP hydrolysis was measured as described previously<sup>2</sup> using an enzyme assay coupling ATP synthase activity to NADH consumption by exogenous lactate dehydrogenase through pyruvate kinase.



**Hydrogen peroxide measurement using Amplex Red.** The production of H<sub>2</sub>O<sub>2</sub> upon reoxygenation *in vitro* was obtained by incubating mitochondrial membranes or mitochondria under anoxic conditions for 25 min, then adding 10 M MitoSNO or MitoNAP for the final 5 min of anoxia before reoxygenation was induced by pelleting the mitochondria or membranes by centrifugation and then resuspending in oxygenated buffer containing fresh respiratory substrate, 0.5 mM ADP, and Amplex Red assay components. H<sub>2</sub>O<sub>2</sub> production was tracked spectrophotometrically by monitoring the oxidation of Amplex Red to resorufin at 585 nm<sup>3</sup>. Samples subjected to *in vitro* anoxia- reoxygenation were compared to samples treated in parallel at normoxia for 30 min.

**Measurement of protein carbonyl content.** Ischemic heart tissue from *in vivo* treatments were snap-frozen in liquid nitrogen and were stored at -80°C. The tissues were then extracted and were assayed for protein carbonyl content using the Protein Carbonyl Enzyme Immuno-Assay Kit (BioCell Corp) according to the manufacturer's guidelines.

**Measurement of apoptosis activation.** Mice were anesthetized with inhaled isoflurane (3% induction, 2% maintenance), and exposed to 30 min cardiac ischemia as described above. After onset of reperfusion, the thoracic incision was closed and mice were monitored until recovery. Buprenorphine (0.05 mg/kg) was given subcutaneously just prior to the end of the surgery and during the recovery period if needed. Left ventricle samples containing the IR-treated tissue were collected 24 h after myocardial infarction. The expression of caspase 3 and cleaved caspase 3 (Cell Signaling Technology, 1:1000 dilution for each, 9662 and 9661) was analyzed by standard Western blotting techniques. The band intensity of three independent experiments was measured using SigmaGel software and normalized to GAPDH (Cell Signaling Technology, 1:1000 dilution, 2118).

**Comparative modeling of subunits of the bovine mitochondrial complex I.** The structure of bacterial complex I from *Thermus thermophilus*<sup>4</sup> was used to produce a comparative model of bovine complex I for analyzing the environment of Cys39 from the ND3 subunit. (Use of mouse sequences generated an essentially identical model). The ND3 subunit of mitochondrial complex I is orthologous to subunit Nqo3 of bacterial complex I. In the membrane domain of bacterial complex I, Nqo3 is in contact with the membrane subunits Nqo8, Nqo10, Nqo11 and Nqo14<sup>5,6</sup>, which are orthologous to the mitochondrial complex I subunits ND1, ND6, ND4L and ND2 respectively. In the model of the complete bacterial complex I, Nqo3 is neighboring the subunits Nqo4 and Nqo6 of the hydrophilic domain, which are orthologous to the mitochondrial complex I subunits 49 kDa and 20 kDa. The protein sequences of these complex I subunits from *T. thermophilus* and *Bos taurus* were downloaded from UniProt<sup>7</sup>. The bacterial protein sequences were edited to remove amino acids that are not resolved in the molecular structures. MUSCLE<sup>8</sup> and manual editing was used to align each pair of orthologous sequences. To improve the quality of the comparative models, by using Jalview<sup>9</sup>, the alignments were edited first to remove the N- and C-terminal residues of the bovine sequences that do not align with sequences resolved in the bacterial structures, and second to place gaps in the bovine sequences such that the distance between these residues in the initial target structure were minimal. By using the MODELLER program<sup>10</sup>, the alignments and subunits of bacterial complex I were used to produce 50 comparative models of the orthologous subunits in bovine complex I. The structures of the

comparative models were examined and figures produced by using the PyMOL molecular visualization system (The PyMOL Molecular Graphics System, Version 1.4.1, Schrödinger, LLC.).

**Cell culture and transfection.** Cardiac derived H9C2 cells were grown in Complete Growth Media (CGM) comprising of DMEM, 4 mM glutamine, 10% FBS, and 1% penicillin/streptomycin. Cells were kept in the incubator at 37°C equilibrated with 5% CO<sub>2</sub>, and were used between passages 27-33. 24 h prior to transfection, cells were plated at 30,000/well on 22-mm 12-well plates (Greiner Bio-One) in antibiotic-free media. After 24 h, half the wells were transfected with 50 nM NDUFAF1 siRNA (QIAGEN, Valencia CA; #SI01602251) using lipofectamine RNAiMAX reagent (Invitrogen) according to the manufacturer's instructions. The other half was transfected with scrambled (negative) siRNA (#1027281). After 72 h, all the wells in a plate were assessed by either Western blotting, *in vitro* IR, or complex I/citrate synthase activity assays.

Verification of the successful gene silencing by RNAi was monitored by Western blotting as described previously<sup>11</sup> with minor modifications. Briefly, proteins were separated on 16.5% reducing SDS-PAGE, and transferred to nitrocellulose membrane. After Ponceau staining, the membrane was cut in four horizontal sections (Supplementary Figure 16a): (i) from the top of the membrane to ~50 kDa was probed with 70 kDa complex II antibodies (1:10000; MitoScience-Abcam Cambridge, MA); (ii) from ~50-37 kDa was probed for actin (1:10000; Calbiochem/EMD Gibbstown, NJ); (iii) from ~37-25 kDa was probed for NDUFAF1 (1:1000; Novus Littleton, CO); (iv) from ~25k Da to the bottom of the membrane was probed for NDUF6 (1:1000; MitoScience-Abcam Cambridge, MA ). Densitometry of the bands was performed using Scion Image software.

## SUPPLEMENTARY METHODS REFERENCES

1. Pacher, P., Nagayama, T., Mukhopadhyay, P., Bátkai, S. & Kass, D. A. Measurement of cardiac function using pressure-volume conductance catheter technique in mice and rats. *Nat. Prot.* **3**, 1422-1434 (2008).
2. Pullman, M. E., Penefsky, H. S., Datta, A. & Racker, E. Partial resolution of the enzymes catalysing oxidative phosphorylation. I. Purification and properties of soluble dinitrophenol-stimulated adenosine triphosphatase. *J Biol Chem* **235**, 3322-3329 (1960).
3. Zhou, M., Diwu, Z., Panchuk-Voloshina, N. & Haugland, R. P. A stable nonfluorescent derivative of resorufin for the fluorometric determination of trace hydrogen peroxide: applications in detecting the activity of phagocyte NADPH oxidase and other oxidases. *Anal. Biochem.* **253**, 162-168 (1997).
4. Baradaran, R., Berrisford, J.M., Minhas, G.S. & Sazanov, L.A. Crystal structure of the entire respiratory complex I. *Nature* **494**, 443-448 (2013).
5. Efremov, R. G., Baradaran, R. & Sazanov, L. A. The architecture of respiratory complex I. *Nature* **465**, 441-445 (2010).
6. Efremov, R. G., Sazanov, L. A. Structure of the membrane domain of respiratory complex I. *Nature* **476**, 414-420 (2011).
7. UniProt Consortium. Ongoing and future developments at the Universal Protein Resource. *Nucleic Acids Res* **39**, D214 (2011).

8. R. C. Edgar, MUSCLE: multiple sequence alignment with high accuracy and high throughput. *Nucleic Acids Res* **32**, 1792 (2004).
9. A. M. Waterhouse, J. B. Procter, D. M. Martin, M. Clamp, G. J. Barton, Jalview Version 2--a multiple sequence alignment editor and analysis workbench. *Bioinformatics* **25**, 1189 (2009).
10. N. Eswar *et al.*, Comparative protein structure modeling using Modeller. *Curr Protoc Bioinformatics* **Chapter 5**, Unit 5 6 (2006).
11. Nadtochiy, S. M. *et al.* Nitroalkenes confer acute cardioprotection via adenine nucleotide translocase 1. *J. Biol. Chem.* **287**, 3573-3580 (2012).
